# Supplementary material for: Challenges to achieving universal health coverage through community-based health planning and services delivery approach: a qualitative study in Ghana
Source: PubMed Central journal article supplement — BMJ Open. 2019 Feb 22;9(2):e024845. doi: 10.1136/bmjopen-2018-024845 (PMC6398772; doi:10.1136/bmjopen-2018-024845), 2019-02-22
Supplement: bmjopen-2018-024845.draft_revisions.pdf [file bmjopen-2018-024845.draft_revisions.pdf]

# BMJ Open

BMJ Open is committed to open peer review. As part of this commitment we make the peer review history of every article we publish publicly available.

When an article is published we post the peer reviewers' comments and the authors' responses online. We also post the versions of the paper that were used during peer review. These are the versions that the peer review comments apply to.

The versions of the paper that follow are the versions that were submitted during the peer review process. They are not the versions of record or the final published versions. They should not be cited or distributed as the published version of this manuscript.

BMJ Open is an open access journal and the full, final, typeset and author-corrected version of record of the manuscript is available on our site with no access controls, subscription charges or pay-per-view fees (<http://bmjopen.bmj.com>).

If you have any questions on BMJ Open's open peer review process please email [info.bmjopen@bmj.com](mailto:info.bmjopen@bmj.com)

# BMJ Open

## Universal health coverage through the community-based health planning and services initiative in Ghana: Hurdles to overcome

|                               |                                                                                                                                                                                                                                                                                                                                                                                                                                                    |
|-------------------------------|----------------------------------------------------------------------------------------------------------------------------------------------------------------------------------------------------------------------------------------------------------------------------------------------------------------------------------------------------------------------------------------------------------------------------------------------------|
| Journal:                      | <i>BMJ Open</i>                                                                                                                                                                                                                                                                                                                                                                                                                                    |
| Manuscript ID                 | bmjopen-2018-024845                                                                                                                                                                                                                                                                                                                                                                                                                                |
| Article Type:                 | Research                                                                                                                                                                                                                                                                                                                                                                                                                                           |
| Date Submitted by the Author: | 16-Jun-2018                                                                                                                                                                                                                                                                                                                                                                                                                                        |
| Complete List of Authors:     | Assan, Abraham ; Tehran University of Medical Sciences, Health Management and Economics; Global Policy and Advocacy Network<br>Takian, Amirhossein; Tehran University of Medical Sciences, School of Public Health, Global Health & Public Policy; Health Equity Research Centre (HERC)<br>Aikins, Moses; University of Ghana, School of Public Health<br>Akbari Sari, Ali; Tehran University of Medical Sciences, Health Management and Economics |
| Keywords:                     | Universal Health Coverage, Community Health, Citizens' Engagements, Community-Based Health Planning Services (CHPS) initiative, Ghana                                                                                                                                                                                                                                                                                                              |
|                               |                                                                                                                                                                                                                                                                                                                                                                                                                                                    |

SCHOLARONE™  
Manuscripts

# Universal health coverage through the community-based health planning and services initiative in Ghana: Hurdles to overcome

---

Abraham Assan<sup>1,2</sup>, Amirhossein Takian<sup>1,3,4\*</sup>, Moses Aikins<sup>5</sup>, Ali Akbari Sari<sup>1</sup>

## Authors' information

### \* Corresponding author

\***Amirhossein Takian**, MD PhD FHEA

Department of Global Health and Public Policy, 2nd Floor, New Building, School of Public Health, Tehran University of Medical Sciences, Poursina Ave., Tehran, Iran. M +98(0)9121041412 & T +98(021)42933225 (E-mail: [takian@tums.ac.ir](mailto:takian@tums.ac.ir) & [takiana@gmail.com](mailto:takiana@gmail.com) ).

**Abraham Assan**<sup>1,2</sup> MPH

<sup>1</sup>Department of Health Management and Economics, School of Public Health, Tehran University of Medical Sciences, Tehran, Iran.

<sup>2</sup>Global Policy and Advocacy Network (GLOOPLAN), Accra, Ghana.  
(E-mail: [abrahamassan@yahoo.com](mailto:abrahamassan@yahoo.com) ).

**Amirhossein Takian**<sup>1,3,4\*</sup> MD PhD FHEA

<sup>1</sup>Department of Health Management and Economics, School of Public Health, Tehran University of Medical Sciences, Tehran, Iran.

<sup>3</sup>Department of Global Health and Public Policy, School of Public Health, Tehran University of Medical Sciences, Tehran, Iran.

<sup>4</sup>Health Equity Research Centre (HERC), Tehran University of Medical Sciences (TUMS), Tehran, Iran.  
(E-mail: [takian@tums.ac.ir](mailto:takian@tums.ac.ir) & [takiana@gmail.com](mailto:takiana@gmail.com) ).

**Moses Aikins**<sup>5</sup> PhD

<sup>5</sup>University of Ghana, College of Health Science, School of Public Health, P. O. Box LG 13, Legon. (E-mail: [mksaikins@ug.edu.gh](mailto:mksaikins@ug.edu.gh) & [maikins57@yahoo.com](mailto:maikins57@yahoo.com) ).

**Ali Akbari Sari**<sup>2</sup> PhD

<sup>2</sup>Department of Health Management and Economics, School of Public Health, Tehran University of Medical Sciences, Tehran, Iran. (E-mail: [akbarisari@tums.ac.ir](mailto:akbarisari@tums.ac.ir) ).

## Funding

This work was supported by Tehran University of Medical Sciences grant number 9413476002, and Global Policy and Advocacy Network (GLOOPLAN), Ghana.

## Authors' contribution

AA conceived the study, served as the principal investigator, and drafted the manuscript. AT contributed to the conception of the study, interpretation of data and the intellectual development of the manuscript, and he is the guarantor. MA also contributed to the conception of the study, assisted in data collection and development of the manuscript, and technically reviewed the article. AAS also help to conceive the study, and facilitated the intellectual development of the paper.

## Acknowledgements

Authors wish to acknowledge the Ministry of Health-Ghana and the Ghana Health Service, and our study participants for their cooperation. We specially thank Dzigbodi K. Hosi, Desmond Otsiabah, Juliet Letsu, Ibrahim Muctar, Francisca Korsaa, Leonard Leonie Sumabe, Isaac Assan, Emmanuel Nana Asare Bempong, and Latif Baako for supporting the study.

**Conflicts of interest:** None declared

**Number of tables:** One

**Word count:** 5653

## Abstract

**Objective:** The Community-based Health Planning and Service (CHPS) initiative emerged to facilitate the achievement of Universal Health Coverage (UHC). Although, CHPS, has created one of the best approaches in increasing communities' commitments towards health system strengthening, its performance has dwindled over the years. This study is first of its kind (following the launch of the SDGs) aimed to holistically explore the barriers limiting CHPS contributions to reach UHC in Ghana.

**Design:** Qualitative study design was adopted to explore the phenomenon. Face-to-face in-depth interviews were conducted from April 2017 until February 2018, through purposive and snowball sampling techniques. Data was analyzed using inductive and deductive thematic analysis approach.

1  
2  
3 **Setting:** Data was gathered at the national level, in addition to the regionals, district and sub-district  
4 /local levels of four regions of Ghana. Sampled regions were: Central Region, Greater Accra Region,  
5 Upper East Region (UER), and Volta region.  
6  
7

8 **Participants:** In total, 67 participants were interviewed – national level (5), regional (11), district (9), and  
9 the sub-district / local levels (42) Interviewees were mainly stakeholders – people whose actions or  
10 inactions actively or passively influence the decision-making, management, implementation of CHPS.  
11 They include; policy makers of the CHPS initiative, managers of CHPS compound and health centers,  
12 politicians, academics, health professionals, technocrats, and community health management committee  
13 members.  
14  
15  
16  
17

18 **Results:** Three broad themes were identified: Inadequate understanding of CHPS concept; major  
19 contextual changes with stalled policy change to meet growing health demands; and changes in political  
20 landscape and leadership with changed priorities threatens CHPS sustainability.  
21  
22  
23

24 **Conclusion:** Barriers to attainment of UHC can be overcome through serious political commitment and  
25 attempt, in addition to the work of the community and international donors. Improved national health  
26 governance is a key driver for CHPS to maximize its contributions towards achieving UHC in Ghana.  
27  
28

29 **Keywords:** Universal Health Coverage (UHC), Community Health, Citizens' Engagements, Community-  
30 Based Health Planning Services (CHPS) initiative, Ghana.  
31  
32  
33

### 34 **Strengths and limitations of this study**

- 35  
36 ➤ The stratified data collection strategy, and the diversity across the study settings helped keep a  
37 balance in the sampled participant across different levels, and with a broader understanding of the  
38 phenomenon from wide range of respondents.
- 39  
40 ➤ Our framework was able to accommodate a wide range of perspectives for pragmatic interpretation,  
41 which can help, we envisage, improve CHPS' contribution towards UHC in Ghana. This became  
42 possible through exploring the different components of the CHPS initiative, regarding how the  
43 content of policy, neglecting actors, context and processes interact to shape policy-making. Further,  
44 our model of policy analysis captured the comprehensiveness of the CHPS initiative – by going  
45 beyond the borders of the health sector – to study the elements of the CHPS policy, its formulation  
46 and evolution over time, how it was implemented and scaled up, and the changing political and  
47 social dynamics around it, plus its role in the Ghana's current health system.
- 48  
49 ➤ To improve study trustworthiness, we explored the phenomenon from different perspectives  
50 (ensuring triangulation), performed member check, ensured transparency of methods and analysis,  
51  
52  
53  
54  
55  
56  
57

1  
2  
3 and involved multi researchers from different background and whose hidden beliefs, values,  
4 perspectives and assumptions were revealed and contested through constant dialogue, to enhance  
5 understandings to the findings.  
6  
7

- 8 ➤ Although this study is the first of its kind to conduct such holistic analysis of the CHPS initiative,  
9 certain vagueness may have emerged while interpreting our themes – data was gathered from  
10 interviewees at various levels and places, and perhaps with different socio-political ideologies and  
11 background – hence we cannot be certain of participants’ underlying rationale of responses  
12 especially with regards to the political, institutional and societal commitments towards the  
13 initiatives – requiring findings to be interpreted with caution.  
14  
15  
16  
17  
18

## 19 **Introduction**

20 Health is a major concern in the global policy environment – an essential requirement for development.  
21 (1) From a broader perspective, population health has been causally associated as an input to economic  
22 growth, (2) either as ultimate goal of development or a vital tool to enhance other welfare outcomes. (3)  
23 For these and many other reasons, health system performance has become increasingly relevant to  
24 countries, both high and Low-Middle Income Countries (LMIC).  
25  
26  
27  
28

29 Today, international policy discussions are focused on accomplishing the Sustainable Development Goals  
30 (SDGs) – a milestone which places specific importance on Universal Health Coverage (UHC). As  
31 mentioned by WHO Director General, UHC is a political choice. (4) The concept of UHC is consistent  
32 with WHO’s vision of “Health for All”, which support a collective credence that all people should have  
33 access to the health services they need without risk of financial ruin or impoverishment. (5) Nonetheless,  
34 considering the existing disparities between and within countries, achieving UHC will require all-  
35 inclusiveness, transparency and participatory processes, and interactions between health systems and the  
36 population – rendering community participation essential to enhance country ownership and  
37 accountability towards efforts to attain UHC and sustainable health development. (6-8) Besides, civil  
38 engagement did influence the unprecedented progress in many areas of the Millennium Development  
39 Goals (MDGs), particularly in addressing AIDS. (9)  
40  
41  
42  
43  
44  
45  
46

47 The health system of Ghana over the years has placed emphasizes on community-based strategy in  
48 delivery of Primary Health Care (PHC). (10) Following several debates and reforms which preceded the  
49 Alma Ata Declaration (1978) of “Health for All” through the PHC approach and Ghana’s Health Sector  
50 Reform in 1996, the Community-based Health Planning and Service (CHPS) initiative emerged in the  
51 wake of geographical barriers to health, to facilitate the achievement of the vision based on the premise  
52 that UHC can be achieved if improved health services are delivered closer to the door-step of community  
53  
54  
55  
56  
57

1  
2  
3 members, particularly to those at the rural and slummy areas. Key service package of CHPS include:  
4 maternal and reproductive health, child health services, treatment of minor ailments, health education and  
5 promotion of healthy lifestyles and follow-up on clients. (11, 12)  
6  
7

8 CHPS has created one of the best approaches in increasing community commitments and ownership  
9 towards health system strengthening, enhancing equitable access and delivery of primary healthcare, and  
10 resources mobilization. (13) Generally, it has also contributed significantly in reducing the MDGs targets  
11 on child (under-5) mortality from 111 per 1,000 live births in 2003 to 60 per 1,000 live births in 2014;  
12 and maternal mortality from 740 per 100,000 live births in 1990's to 319 per 100,000 live births in 2015 –  
13 hence serves as a dynamic window of opportunity to better reimagine health-related SDGs. (14) Yet,  
14 many challenges persist and threatens the successes and sustainability of the initiative. For instance, the  
15 implementation of CHPS is not meeting the expected outcomes, partly due to inadequate transport and  
16 equipment/medicines, poor supervision of CHPS programme, weak or destroyed health infrastructure,  
17 physical inaccessibility, insufficient trained community health workforce and high attrition rate, cultural  
18 and behavioral beliefs, and poor referral support. (15) As a result, its performance has dwindled across all  
19 regions of Ghana. (16) For example, the current contribution of CHPS to Out Patients Department  
20 (OPD's) attendance across the country is only 5%, which may not worth the resources vested into the  
21 initiative. (14) This study is first of its kind (following the launch of the SDGs) aimed to holistically  
22 explore the barriers limiting CHPS contributions to reach UHC in Ghana.  
23  
24  
25  
26  
27  
28  
29  
30  
31  
32  
33

## 34 **Methods**

### 35 **Study design, Settings, Sampling and Data collection**

36 The qualitative study design was used to explore the phenomenon. The study was conducted in four  
37 regions of Ghana, to represent diversity in terms of socioeconomic status, cultural, religion, geographical  
38 position, and level of performance of CHPS in the country. (11, 14, 16) Sampled regions were: Central  
39 Region, Greater Accra Region, Upper East Region (UER), and Volta region. Data was gathered at four  
40 levels – national, regional, district and local levels to ensure triangulation. (17) A purposive and snowball  
41 sampling techniques was employed to identify study participants at the national and the regional levels.  
42 (18) At the districts and the local levels, participants were sampled through the snowball technique. (19)  
43 Three university graduates with experience in research were recruited and trained to assist in data  
44 collection. Training lasted for three days. Pre-testing of data collection instruments was done during the  
45 training session.  
46  
47  
48  
49  
50  
51  
52  
53

54 Face-to-face in-depth interviews were conducted from April 2017 until February 2018. Interviews were  
55 conducted in English. Separate semi-structured interview guides were designed for interviews at each  
56  
57

1  
2  
3 level. Data was gathered until saturation – where we realized no new data was emerging. (20) Interviews  
4 lasted between 25 – 45 minutes. In total, 67 participants were interviewed – national level (5), regional  
5 (11), district (9), and the sub-district / local levels (42) – refer table 1 for list of interviewees and their  
6 characteristics and study settings. Interviewees were mainly stakeholders – people whose actions or  
7 inactions actively or passively influence the decision-making, management, implementation of CHPS.  
8 They include; policy makers of the CHPS initiative, managers of CHPS compound and health centers,  
9 politicians, academics, health professionals, technocrats, and community health management committee  
10 members. Addition to the interviews were documents review and observation.  
11  
12  
13  
14  
15

### 16 Data analysis

17 All interviews were audio recorded. Data gathered was transcribed verbatim. Coding was done manually.  
18 We used Walt and Gilson's policy triangle to guide data analysis. This framework was selected because it  
19 has influenced health policy research in a diverse array of countries, and has been used to analyze several  
20 health issues and health sector reform – which is appropriate in the context of our study. The framework  
21 enabled us to explore the perspectives of the different components of the CHPS initiative, regarding how  
22 the content of policy, neglecting actors, context and processes interact to shape policy-making (21).  
23 Further, we remained open to accommodate other emerging themes – hence we employed the hybrid  
24 interactive processes of inductive and deductive thematic analysis to interpret our data. (22)  
25  
26  
27  
28  
29  
30

31 Codebooks were developed, and themes that emerged from the data were repeatedly reviewed using the  
32 research questions. To enhance trustworthiness of findings, two research members (AA, MA) were  
33 assigned to do first coding (open breakdown of themes). This enabled us to identify all prevailing themes  
34 in the study. Next, (AT, AAS) created inter-code connections among themes. Relevant codes which were  
35 associated with study objectives were extracted, compared and discussed among members. Similarities  
36 and differences between codes were also addressed. (23)  
37  
38  
39  
40

41 Next, through thorough content analysis, we interpreted the categorized themes which were relevant to  
42 the accomplishment of the objectives of the study. That is, we read the documents and transcripts  
43 repeatedly (got immersed with the data), performed member checks, and coded them inductively and  
44 deductively, followed with iterative analysis. This enabled us to understand, interpret extracted themes,  
45 which were centered on, and relevant to the CHPS initiative. Finally, core categorical themes were  
46 selected, analyzed and compared with existing literature to ensure the reliability, validity and  
47 comprehensiveness of our findings (Selective coding). (23) Final codes were developed based on  
48 consensus of the entire research team (AS, AT, MA, AAS).  
49  
50  
51  
52  
53  
54  
55  
56  
57  
58  
59  
60



## Ethical Considerations

This study was first approved by the ethics committee of Tehran University of Medical Sciences (code: IR.TUMS.VCR.REC.1395.1699), followed by the Ghana Health Service Ethical Review Committee (registration number: GHS-ERC: 08/03/2017). We also obtained written permission from the regional and district levels of all study settings, before commencing data collection. Further, we acquired written consent from all participants and guaranteed them of their privacy, confidentiality and anonymity of any information they provide. Participation was voluntary, and without any compensation. Participants were given the right to opt out from the study at any point.

## Results

The Community-based Health Planning and Service (CHPS) initiative was found in 2000 to facilitate the achievement of Universal Health Coverage (UHC), by providing improved health services, mainly preventive, promotive and treatments of minor ailments closer to the door-step of community members, particularly to those at the rural areas – efforts aimed to address geographical barriers to health. Although, CHPS has created one of the best approaches in increasing communities’ commitments towards health system strengthening, its performance has declined over the years. According to our findings, inadequate understanding of CHPS concept; major contextual changes with stalled policy change to meet growing health demands; changes in political landscape and leadership with changed priorities – threatens CHPS sustainability.

### 1. Inadequate understanding of the CHPS concept

CHPS has been in existence for almost seventeen years. Yet, the concept of CHPS has not been fully gripped by the major stakeholders, most importantly, political institutions and community members. To achieve universal access to healthcare in Ghana, CHPS remain ideal – serving as a vehicle not just for delivering health care, but to the very door step of the client. Nonetheless, according to our findings, major actors operate but at varying degrees to achieve personal interests – not necessarily to contribute to achieving the key mandate of CHPS. That is, political bodies, through active collaboration with District Assemblies construct CHPS compounds for political gains – i.e. to solicit for votes, sometimes without even consulting the health directorate. As a result, most CHPS structure do not meet the required building plan, while others are not strategically situated to address the geographical barriers to accessing health care – a primary goal the initiative seek to achieve.

*“In fact, I should state that some stakeholders don’t really understand the role as far as CHPS initiative is concern. Politicians one way or the other think we should construct CHPS compounds where they had won votes. Some even go to the extent of constructing CHPS facility without prior consultation from the*

1  
2  
3 *health directorate, which at the end are not being patronized by the clients because it may be either at the*  
4 *outskirt of the town where health officers find it difficult to reside there or where it's too far from*  
5 *clients". – Municipal Health Director*  
6  
7

8  
9 Our findings also revealed the community entry processes were not properly carried-out from the onset –  
10 influencing many implementation flaws. For example, community members routinely demand of services  
11 which do not form part of the service package of CHPS, and often beyond the capabilities of the  
12 community health professions. That is, communities consider CHPS to be a health centre or a hospital,  
13 hence, expect health professionals to be able to provide a more comprehensive service.  
14

15  
16 *"the concept of CHPS is still not well understood by a bigger session of the community – clients today*  
17 *still perceive that when you talk of health, it is getting sick and being treated. They least understand the*  
18 *CHPS concept emphasizes more on health promotion and prevention. Due to that, you may get up in the*  
19 *morning with plans to go for home visit (for health talk) just to find clients in queues demanding for*  
20 *medical treatments – services which we are not even permitted to render. I think once the people know*  
21 *that the policy is to prevent them from being sick, then of course, they won't wait till they are sick and*  
22 *then be running to the health facilitates. – Community Health Officer*  
23  
24  
25  
26  
27  
28  
29

30 Again, members of the community were not made to fully understand that CHPS is community-driven  
31 and therefore it successes greatly depends on the community. Community members were of the belief that  
32 the government should be solely responsible for the total establishments and management of CHPS. In  
33 view of that, there is a growing perception that CHPS is a strategy used by the government to shift their  
34 core responsibilities to its citizens – given that the initiative is community-induced. Besides, as observed,  
35 majority of amenities of most facilities were either provided by the community and non-governmental  
36 organizations (especially the international donors).  
37

38  
39 *"We have been convinced to build our own health facility, advocate for the provision of health amities*  
40 *and logistics, and pay our utilities, what then is the role of the government if health development of a*  
41 *community is to be exclusively provided by the community?" – Community Leader*  
42  
43  
44  
45  
46

## 47 **2. Major contextual changes, with ensuing stalled policy change to meet growing demands**

48 CHPS is currently faced with major contextual changes, with ensuing stalled policy changes to address  
49 current health needs and expectations of the communities – mainly due to inadequate dedicated resources  
50 to sustain the initiative, and rigid organizational framework.  
51

52 Over a decade ago, people were travelling long distances to access health and therefore there was the need  
53 to send services to the rural areas, through which CHPS was originally birthed to primarily provide  
54  
55  
56  
57

1  
2  
3 services at the door-steps of households. CHPS compounds were strategically erected in selected  
4 communities to facilitate service provision – where community health professionals were tasked to  
5 provide door-to-door services to communities including those without a CHPS compound. Nevertheless,  
6 today, despite being a national policy for all electoral areas to have a CHPS compound, almost all  
7 communities demand CHPS compound to be constructed in their communities – many of which are even  
8 putting up structures without governments support. However, according to our study, the existence of a  
9 “physical CHPS structure” has implied increasing health demand by community members – as clients  
10 perceive it as a hospital. Hence, the present demand and expectations of communities extend beyond the  
11 services package of CHPS – which is mainly preventive, promotive and treatment of minor ailment.  
12 Based on our findings, community members upon constructing a CHPS compound would want CHPS to  
13 function as a health center or a hospital, and demand for extra health departments especially maternal  
14 health units – aspirations which are barely difficult to peruse considering the aim of CHPS. Besides, the  
15 rising health demands and the willingness of communities to expand the service package of CHPS exacts  
16 much pressure on the governments – largely due to unplanned resources to sustain the initiative. As a  
17 result, CHPS facilities lack basic logistics and medicines needed to treat minor ailments. This has led to  
18 rampant referral of health cases to either the health centre or the hospital. Yet, neither of the CHPS  
19 compounds across all the regions even had an ambulance to facilitate referral processes. Health  
20 professionals had to rely on commercial vehicles and motorcycles during referrals, and even with that,  
21 aside not appropriate for referrals, these vehicles are often either far away from CHPS compounds to  
22 render immediate service or clients don’t have the money to pay for the fare, leaving the financial burden  
23 on the health professionals.  
24  
25  
26  
27  
28  
29  
30  
31  
32  
33  
34  
35  
36  
37

38 *“...CHPS is expanding at rate governments are not able to cope. The request for new facilities or units*  
39 *implies that the government need to increase the provisions for logistics, employ more staffs, pay workers*  
40 *their remunerations etc. Meanwhile, the budget for the sector is not growing at a rate we are expected to*  
41 *spread our services. Yes, our main objective is to improve access, but we are limited due to inadequate*  
42 *resources”* – Senior Policy Maker (National Level)  
43  
44  
45  
46

47 Moreover, improved knowledge is changing health practices especially among urban residents. Yet,  
48 CHPS is faced with inadequate resources for capacity building of community health professionals, to  
49 fully meet health needs and expectations, to match the changing health practices of their clients. To this  
50 end, urban residents especially evinced a negative attitude towards community health professions  
51 (particularly health volunteers), questioning their credibility to educate them about health.  
52  
53  
54  
55  
56  
57

1  
2  
3 *“I was first working in a rural community, but we were recently reshuffled and was posted to the city.*  
4 *Fairly speaking, I prefer to work in the rural areas. You see my entire work is to promote health or*  
5 *educate the community about health. But within the city, the residents are knowledgeable. Some even*  
6 *refuse to listen to our health talk because they feel they are well informed even than the community health*  
7 *experts. Besides, they get any information they need on the internet. But working as a health officer in the*  
8 *rural areas is quite a different. I remember when I was first posted to my previous workplace (village),*  
9 *the entire community was exceedingly glad to have us. But in the city, in fact their responses to our*  
10 *questions are something demoralizing. I think, the training that I acquired was very useful to me when I*  
11 *was working in the village but the situation in the city is quite different”.* – Community Health Officer  
12  
13

14  
15  
16  
17  
18 Additionally, seventeen years ago, it might be relatively easier to reach all community members or  
19 villagers in person and in groups. According to our study, health professionals lack the appropriate  
20 mobilization skills to successfully organize health durbars. Again, there is a limited use of digital tools in  
21 ensuring that community members irrespective of place and time do have consistent access to health  
22 information. Further, while volunteerism was found fundamental in CHPS sustainability, the concept  
23 although is properly understood by community members, the idea has been met with strong resistance  
24 where volunteers today demand salaries for their services. According to volunteers, “it is very  
25 discouraging getting up every morning for work and at the end of the month you end up receiving no  
26 salary. I have been a community volunteer for over 15 years, yet I cannot boast of significant reward for  
27 my work. I understand I volunteered for this kind of work but mind you I also have families”.

28  
29  
30  
31  
32  
33  
34  
35 *“Currently, it is difficult mobilizing community members for health durbars. Most of them are engaged*  
36 *with economic activities – hence leave very early for farms (work) and return late. Also, community*  
37 *participation was initially stronger because we had active volunteers supporting our work. But today,*  
38 *volunteerism is no more, and is really affecting our work”.* – Community Health Officer  
39  
40  
41  
42

### 43 **3. Changes in the political landscape and leadership with changed priorities**

44 Complex interactions of actors were found to have a critical influence on CHPS. To our participants,  
45 although a broader political process is required for CHPS sustainability, recent commitments of political  
46 bodies towards CHPS are not up to expectation. Every government comes with its own priorities –  
47 nobody continues from where the previous government ended. What governments commonly done is to  
48 construct CHPS compounds – leaving behind provision of logistics – since the number of compounds  
49 built is often considered as major political achievements. Also, although, our study revealed a more  
50 prevailing commitment by the community members and the international donors to improve CHPS, while  
51 communities lack the needed resources to sustain the initiative, policy inconsistency also threatens the  
52  
53  
54  
55  
56  
57

1  
2  
3 sustainability of projects pursued by international donors. That is, these international bodies mostly  
4 implement pilot projects for a stipulated time and then leave, but who to commit to the course left behind  
5 and provide the desired resources to sustain the initiative is a challenge which retards the progress of  
6  
7 CHPS.  
8  
9

10 *“CHPS is more a political tool now – it is just on the lips of our politicians. They promise a lot but*  
11 *deliver little. When it comes to logistics often rely on donor partners who mostly come to pilot projects for*  
12 *a stipulated time and then leave. But whether such projects are sustained is another issue because when*  
13 *they pull-out who to continue from wherever they ended is also a unique challenge altogether.*  
14 *Nonetheless, if the leaders are so vibrant and active, you see them going in and out sourcing for funding*  
15 *to sustain the initiative. But you wouldn't see that in places where the leaders do not believe in the*  
16 *concept of CHPS. So, there will be a bit of variation in the level of performance depending on who for*  
17 *example is the head, and more to the point where the developing partners seek to work. This is part of the*  
18 *reason why some regions have several partners helping to improve CHPS, and otherwise. So, that might*  
19 *resort to a bit of disparity in performance, but when you talk about challenges faced by the initiative due*  
20 *to governmental commitments, then that tends to be a countrywide challenge”.* – Renowned Researcher  
21 on CHPS  
22  
23  
24  
25  
26  
27  
28

29  
30 Furthermore, we found communities' independent efforts being driven by loss of trust in the  
31 Governments to fully provide their health needs. To the community members, Governments have shown  
32 inadequate exertion to provide CHPS compounds the basic resources. Hence, any initiative where  
33 communities can lead the forefront of their development and not to always rely on the government is  
34 worthy to embrace. In view of that, community leaders and members with improved understanding of the  
35 CHPS concept independently exhibited vigorous efforts towards issues of health and development.  
36  
37  
38

39  
40 *“We never waited for the Ghana Health Service to inform us that we are due for CHPS compound. That*  
41 *would have taken a long time, considering the political processes involved. The community has formed an*  
42 *alliance with a UK based Trust that support our development. So, we proposed to them to also support*  
43 *the establishment of our facility, and over five years the community has also been contributing to pay the*  
44 *utilities of the facility.”.* – Traditional Leader (Chief)  
45  
46  
47

48 On the other hand, where there were chieftaincy disputes, key stakeholders (especially traditional leaders)  
49 oppose decision-making processes and program implementation. As an example, we observed low  
50 community participation in communities facing chieftaincy and land disputes, or without a chief – since  
51 health professionals find it difficult identifying which leader to consult to serve as a focal point to engage  
52  
53  
54  
55  
56  
57

1  
2  
3 its citizens. Also, due to lack of consensus, family members and friends of opposing leaders also refuse to  
4 attend programs being organized for the community.  
5

6 *“Communities are encountering series of chieftaincy and land disputes. As a result, you may organize a*  
7 *health durbar in one community, and it will interest you to know that part of the community members will*  
8 *deliberately not attend, expecting a separate durbar to be conducted for them. The reason being that,*  
9 *opposing leaders would want to be also recognized and treated as community heads. Unlike elsewhere,*  
10 *where you find out that a community has just one chief (leader) who perhaps may serve as the head of the*  
11 *CHPS zone to engage its citizens”.* – Community Youth Volunteer  
12  
13  
14  
15

## 16 17 18 **Discussion**

19 The Alma-Ata Declaration identified the role of a comprehensive primary health care (PHC) as one of the  
20 cornerstones to any sustainable health system. Following that, the development of health delivery based  
21 on a primary health care approach of care delivery has received a paradigm shift towards the deployment  
22 of several forms of community health workers (CHWs) – as cadres capable of delivering effective care at  
23 the least cost, at the community and household levels. (24)  
24  
25  
26

27  
28 Most recently, community-based initiatives also served as a major contributing factor to the many  
29 achievements made under the Millennium Development Goals – particularly goals 4, 5 and 6, which  
30 aimed to reduce child mortality, improve maternal health and combat HIV/AIDS, malaria and other  
31 diseases. By this approach, several LMICs excelled in deploying CHW programs in recognition of their  
32 potential role towards UHC – by identifying, referring complex cases and, in many situations, managing  
33 minor ailments, particularly at the local/household levels. To state a few, a review literature on  
34 antiretroviral treatment programme delivery and outcomes in least resourced countries revealed positive  
35 impact of community-based support services on access, coverage, virological and immunological  
36 outcomes, patient retention and survival. (25) In Lesotho, South Africa, Namibia, and Botswana, a recent  
37 study also identified positive association between the community support programs and rapid increase  
38 and higher levels of adherence to HIV treatment. (26) Besides, the community initiatives helped improve  
39 clinical care quality in several countries, i.e. in Zambia (27), which could be the result of the strategy’s  
40 ability to facilitate medical education to meet community needs through peer counselling, as occurred in  
41 Ethiopia and Uganda. (28) Furthermore, a study conducted in the Democratic Republic of the Congo also  
42 recorded a 50% decline in malaria morbidity in the project area, where CHWs were deployed to  
43 administer treatment but remained stable in the control area, as well as improving health care behaviors in  
44 the intervention area. (29) A most recent study in Ghana also revealed improved malaria prevention  
45 practices among individuals with a history of community volunteers having visited their households to  
46  
47  
48  
49  
50  
51  
52  
53  
54  
55  
56  
57



1  
2  
3 educate them about malaria. (30) Again, the role of lady health worker program in Pakistan was  
4 significant in raising awareness and changing attitudes regarding health and family planning – which  
5 contributed to about 15% reduction in the neonatal mortality rate in recent pilot projects. (31) In brief, a  
6 well-designed community-driven program has proved effective in representing one of the several  
7 initiatives capable of establishing a more substantial means in addressing crippling PHC system – most  
8 notably: its relevance in addressing shortage and poor distribution of health workers to the extent of  
9 producing physicians who choose to practice in rural and underserved areas, expanding and strengthening  
10 coverage of key health programs, and re-organizing health workforce to address challenges pertaining to  
11 low access to quality, people-centered, affordable and acceptable health care services. (24)

12  
13  
14  
15  
16  
17  
18  
19 Yet, key challenges continue to threaten sustainability of community-based initiatives. As an example,  
20 Ghana's adoption of CHPS' initiative in the year 2000, was a strategic move to advance national health  
21 equity agenda in providing improved quality care to all – by bridging geographical barrier to health. (11)  
22 However, according to our findings, inadequate understanding of the CHPS concept and the lack of equal  
23 cooperation among major actors of CHPS including political bodies, NGO's, the health directorate and  
24 the District Assemblies, and chieftaincy disputes have produced disunity about what needs to be done. As  
25 a result, political parties today often situate CHPS compounds anywhere to fulfil a campaign promise and  
26 not necessarily to address geographical barriers to health. Conflicting stakeholder interests and ethical  
27 concerns have led to a several disorganized national debates, particularly during establishment or  
28 expansion of public health services. (32) Hence, politics and stakeholders' engagements matters at each  
29 phase of health reform – as existing institutions and interest groups often have both the reasons and the  
30 resources to vigorously oppose change, (33) as experienced for instance by the Iranian health system  
31 where medical doctors initially opposed family physician program in rural Iran due to lack of prior  
32 consultation. (19) Notwithstanding that, community participation in all aspects of policies is essential to  
33 enhance sustainability through country ownership and accountability. (7, 34) – if not, ensuring local  
34 ownership will continue to be challenging as occurred in Brazil. (35)

35  
36  
37  
38  
39  
40  
41  
42  
43  
44  
45  
46 The governments' struggle to resolve the conflict between what they are willing to spend on and what  
47 clients want is a fundamental health sector reform dilemma anywhere. (36) In view of that, most LMICs  
48 are faced with the maldistribution of limited resources in the face of pressing health needs – where public  
49 sector is often perceived as providing inferior service, and many citizens – even among the poor – may  
50 have to pay for improved services out of pocket – resulting to a varying degree of service and health  
51 status between urban and rural residents and between the rich and poor. (32) In this respect, many  
52 countries that are even noted for sustainable community-based programs, maybe affected by the effect of  
53  
54  
55  
56  
57

1  
2  
3 increase in workload on the community health professionals, which in turn can compromise the quality of  
4 health services they provide. (37)  
5  
6  
7

8 In Ghana, the CHPS initiative is also increasingly becoming complex and difficult to manage. CHPS'  
9 openness to change and the increasing diversity of demand and expectations of clients, renders the entire  
10 initiative an "episodic and cyclical character". That is, any pressing demand is considered critical making  
11 it a target for reform, although it might not be strategic implementing such initiative at that level of care.  
12 As part of our findings, the increasing demand of maternity unit has raised varying views among  
13 stakeholders as whether all CHPS facility need to have a delivery ward, or clients should be referred to  
14 the next level of care. Adding to that, the component of minor treatments within the service package has  
15 rendered the initiative less effective and efficient, and eventually is causing the community members to  
16 lose trust in the community-based health system. That is, despite the rising demand and expectations,  
17 CHPS is challenged with inadequate resources (even basic logistics) to treat minor ailments, which has  
18 led to rampant referrals of health cases and its associated costs. In addition, some of the CHPS'  
19 compounds visited that have midwifery unit are faced with lack of basic equipment and the required  
20 infrastructure to foster efficiency of services provided. Hence, we are of the view that CHPS can achieve  
21 eloquent results if efforts are geared towards improving preventive and promotive services – rather than  
22 curative care. Besides, due to unplanned resource allocation by the governments, a midwifery delivery  
23 department at the facility will led to further unanticipated malfunctions of the system. In addition, as  
24 societies modernize and become more affluent and knowledgeable, what people consider to be desirable  
25 ways of living as individuals and as members of societies may change. (38) Yet, CHPS initiative is faced  
26 with lack of resources to help build the capacity of community health professionals – particularly  
27 regarding the use of tools in responding to changes in health practices, and ways to enhance better  
28 community participation and mobilization, as well as efficiency. As a result, clients, especially the urban  
29 residents show negative attitudes towards community health professions (especially health volunteers),  
30 questioning their credibility to even educate them about health. Notwithstanding that, these challenges  
31 could also serve as a platform for change and innovations. Yet, based on our findings, it might also  
32 overburden the international donors and the NGO's – considering the limited political commitments in  
33 sustaining the initiative. Again, it may place immense strains on communities, where communities with  
34 least resources to support themselves and to meet challenges may produce little health performance, as  
35 happened in other settings. (38)  
36  
37  
38  
39  
40  
41  
42  
43  
44  
45  
46  
47  
48  
49  
50  
51

52  
53  
54 To fully address the phenomenon, it is recommended that health care financing for dispersed inhabitants  
55 often need larger per capita expenditure, and in countries with both high-density and low-density  
56  
57



1  
2  
3 populations, it is expected that dispersed populations receive some subsidy to promote equity. (39) In  
4 addition, countries are devising cost-effective innovations that meet the health and well-being of its  
5 citizens from an explicitly multi-sectoral perspective, with a focus on expanding coverage of curative  
6 healthcare, while reinforcing promotive strategies and cross-sectoral actions on social determinants of  
7 health. (40) Although, that tends to be expensive, communities can secure such inputs at a manageable  
8 cost by joining forces. (41) Our study revealed that communities that are making meaningful  
9 advancement through the CHPS initiative are those that are either resourced or have leaders constantly  
10 negotiating for support from non-governmental institutions. In addition, the use of radio communications  
11 has shown successful in overcoming geographical obstacles to health in such areas, in a more efficient  
12 and affordable manner. (39)

13  
14  
15  
16  
17  
18  
19  
20  
21  
22  
23  
24  
25  
26  
27  
28  
29  
30  
31  
32  
33  
34  
35  
36  
37  
38  
39  
40  
41  
42  
43  
44  
45  
46  
47  
48  
49  
50  
51  
52  
53  
54  
55  
56  
57  
58  
59  
60  
Community health workers have featured in the discourse of many global public health agenda – by  
proving effective in addressing issues that have adverse impact on moving towards UHC. Today, in the  
era of SDGs, health is considered a political choice, and everyone's concern to drive the world to a state  
where health must be universal and equitable. (42) Nonetheless, to achieve meaningful results, it is edged  
that countries adapt specific targets and actions based on national priorities that promote country  
ownership and accountability, (34) – reaffirming the profound role of community-based programs in  
many LMICs (43), including Ghana.

### **Policy recommendations to increase the chances of success**

Community-based initiatives are increasingly represented as a potential strategy to strengthen PHC.  
Nonetheless, certain vital gaps still impede their progress. Based on our findings, the following are  
recommended for community-driven initiatives to better help serve its purposes.

1. Greater transparency and coordination among actors – particularly the community members, the  
NGO's, politicians and the health directorates is critical to sustain the community-based  
initiatives. Nevertheless, understanding the perspectives, the underlying values, the policy  
contents and the ways in which changed priorities or divergent institutional goals could emerge,  
can contribute to achieving intended purpose.
2. There is an increasing demand for services beyond the scope of community professionals. We  
therefore recommend the provision of an effective ambulances services to facilitate referral  
processes from the community level to the highest level of care.
3. Advancement in knowledge and urbanization are changing public health practices. Community  
health professionals need consistent training to be able to meet such terrain – to provide effective

1  
2  
3 treatments that take better account of addressing social determinants of health (SDH), and the use  
4 of digital tools and effective community mobilization skills in shaping public health practices.

- 5  
6 4. We commend academic institutions to also build robust relations, training plans, and coordination  
7 with communities and community health development platforms to provide a framework for  
8 sustainable programs that are focused on achieving health equity, and capacity building.

9  
10 However, due to cultural variations and the nature of social contract in diverse sociocultural  
11 settings, the implementation of such plans is recommended to be done with caution.  
12  
13

14  
15  
16 Further studies are required to:

- 17  
18 ○ Explore digital tools that can help improve knowledge of community health  
19 professionals, enhance community participation/mobilization and health practices and  
20 interventions, and can foster greater accuracy and efficiency of activities.  
21  
22 ○ Identify ways in which factors such as the quality of community health governance and  
23 policy coherence can be maximized.  
24  
25 ○ Investigate ways to provide sustainable community health financing and resource  
26 mobilization.  
27  
28  
29

### 30 31 **Conclusion**

32 Universal health coverage is a growing concern and a core target of the SDGs. Nonetheless, considering  
33 the existing disparities between and within countries, attaining UHC will necessitate all-inclusiveness, a  
34 participatory processes and interactions between health systems and the population. This has led to a  
35 renewed relevance of CHPS in Ghana — an initiative which practically relies on citizen engagement as a  
36 central instrument in the delivery of services closer to the door-step of clients, particularly to those at the  
37 rural or slummy areas. Despite its recognition in safeguarding communities' commitments and country's  
38 ownership to attain UHC, gaps continue to impede its successes. They include: inadequate understanding  
39 of the CHPS concept – much of which is due to poor community entry and sensitization programs during  
40 the onset of CHPS scale-up. Again, major contextual changes, with ensuing stalled policy change to meet  
41 growing demands, and changes in the political landscape and leadership, with changed priorities or  
42 opposing forces – all threatens CHPS sustainability. Our study concludes that what is essential to  
43 influence positive change for achievements of UHC in Ghana (through CHPS) is the political will – an  
44 improved national health governance and the political determinants to lead actions of the community and  
45 international donors.  
46  
47  
48  
49  
50  
51  
52  
53  
54  
55  
56  
57  
58  
59  
60

## Data sharing

For extra data contact the corresponding author through [takiana@gmail.com](mailto:takiana@gmail.com).

## Reference

1. Sen A. Development as Freedom New York. Knopf; 1999.
2. Bloom DE, Canning D. The health and wealth of nations. *Science*. 2000;287(5456):1207-9. PubMed PMID: 10712155.
3. Sachs JD. Macroeconomics and health: investing in health for economic development. *Revista Panamericana de Salud Pública*. 2002;12(2):143-4.
4. WHO. WHO estimates cost of reaching global health targets by 2030: World Health Organization; 2017.
5. Organization WH. The world health report 2013. Research for universal health coverage. Geneva: WHO; 2013. 2014.
6. Smith J. Transnational processes and movements. *The Blackwell companion to social movements*. 2004:311-35.
7. London L. What is a human-rights based approach to health and does it matter? *health and human rights*. 2008:65-80. PubMed PMID: 20845830
8. Takian A, Akbari-Sari A. Sustainable Health Development Becoming Agenda for Public Health Academia. *Iranian journal of public health*. 2016;45(11):1502. PubMed PMID: 28028502; PubMed Central PMCID: PMC5182259
9. Spicer N, Aleshkina J, Biesma R, Brugha R, Caceres C, Chilundo B, et al. National and subnational HIV/AIDS coordination: are global health initiatives closing the gap between intent and practice? *Globalization and health*. 2010;6(1):1. doi: 10.1186/1744-8603-6-3. PubMed PMID: 20196845; PubMed Central PMCID: PMC2838862
10. MOH. Accelerating attainment of Universal Health Coverage and bridging the access inequity gap: National Community Health Planning and Services (CHPS) Policy, working draft for validation, - Ghana. Accessed 22-04-2016 at <http://www.moh-ghana.org/UploadFiles/Publications/CHPS%20policy%20final160203050422.pdf>. 2014.
11. Awoonor-Williams JK, Sory EK, Nyongator FK, Phillips JF, Wang C, Schmitt ML. Lessons learned from scaling up a community-based health program in the Upper East Region of northern Ghana. *Global Health: Science and Practice*. 2013;1(1):117-33. doi: 10.9745/GHSP-D-12-00012. PubMed PMID: 25276522; PubMed Central PMCID: PMC4168550.
12. Adongo PB, Phillips JF, Aikins M, Arhin DA, Schmitt M, Nwameme AU, et al. Does the design and implementation of proven innovations for delivering basic primary health care services in rural communities fit the urban setting: the case of Ghana's Community-based Health Planning and Services (CHPS). *Health Research Policy and Systems*. 2014;12(1):1. doi: 10.1186/1478-4505-12-16. PubMed PMID: 24690310; PubMed Central PMCID: PMC3994228
13. Sakeah E, McCloskey L, Bernstein J, Yeboah-Antwi K, Mills S, Doctor HV. Is there any role for community involvement in the community-based health planning and services skilled delivery program in rural Ghana? *BMC health services research*. 2014;14(1):340. doi: 10.1186/1472-6963-14-340. PubMed PMID: 25113017; PubMed Central PMCID: PMC4251607
14. MOH. National Community-Based Health Planning and Service (CHPS) Policy: Accelerating Attainment of Universal Health Coverage and Bridging the Access Inequity Gap: MOH, Ghana; 2016.

15. MOH. Policy brief of Community-based Health Planning and Services (CHPS)- Ghana. Accessed 23-04-2016 at <http://www.moh-ghana.org/UploadFiles/Publications/policy%20brief%20on%20CHPS2130109060128.pdf>. 2012.
16. Awoonor-Williams JK, Bawah AA, Nyongator FK, Asuru R, Oduro A, Ofosu A, et al. The Ghana essential health interventions program: a plausibility trial of the impact of health systems strengthening on maternal & child survival. *BMC health services research*. 2013;13(2):1. doi: 10.1186/1472-6963-13-S2-S3. PubMed PMID: 23819518; PubMed Central PMCID: PMC3668206
17. Silverman D. *Interpreting qualitative data: Methods for analyzing talk, text and interaction*: Sage; 2006.
18. Patton M. *Qualitative research and evaluation methods* .(Rev. ed of: *Qualitative evaluation and research methods*. 2nd. Thousand Oaks, CA: Sage; 2002.
19. Takian A, Doshmangir L, Rashidian A. Implementing family physician programme in rural Iran: exploring the role of an existing primary health care network. *Family practice*. 2013:cmt025. doi: 10.1093/fampra/cmt025. PubMed PMID: 23788202
20. Creswell JW. *Qualitative inquiry and research design: Choosing among five approaches*: Sage; 2013.
21. Gilson L, Raphaely N. The terrain of health policy analysis in low and middle income countries: a review of published literature 1994–2007. *Health policy and planning*. 2008;23(5):294-307. doi: 10.1093/heapol/czn019. PubMed PMID: 18650209. PubMed Central PMCID: PMC2515407
22. Fereday J, Muir-Cochrane E. Demonstrating rigor using thematic analysis: A hybrid approach of inductive and deductive coding and theme development. *International journal of qualitative methods*. 2006;5(1):80-92.
23. Corbin JM, Strauss A. *Grounded theory research: Procedures, canons, and evaluative criteria*. *Qualitative sociology*. 1990;13(1):3-21.
24. Glenton C, Colvin CJ, Carlsen B, Swartz A, Lewin S, Noyes J, et al. Barriers and facilitators to the implementation of lay health worker programmes to improve access to maternal and child health: qualitative evidence synthesis. *Cochrane Database Syst Rev*. 2013;10(10). doi: 10.1002/14651858.CD010414.pub2. PMID: 24101553
25. Wouters E, Van Damme W, van Rensburg D, Masquillier C, Meulemans H. Impact of community-based support services on antiretroviral treatment programme delivery and outcomes in resource-limited countries: a synthetic review. *BMC health services research*. 2012;12(1):194. doi:10.1186/1472-6963-12-194. PubMed PMID: 22776682. PubMed Central PMCID: PMC3476429.
26. Kabore I, Bloem J, Etheredge G, Obiero W, Wanless S, Doykos P, et al. The effect of community-based support services on clinical efficacy and health-related quality of life in HIV/AIDS patients in resource-limited settings in sub-Saharan Africa. *AIDS patient care and STDs*. 2010;24(9):581-94. doi: 10.1089/apc.2009.0307. PMID: 20799894.
27. Morris MB, Chapula BT, Chi BH, Mwangi A, Chi HF, Mwanza J, et al. Use of task-shifting to rapidly scale-up HIV treatment services: experiences from Lusaka, Zambia. *BMC health services research*. 2009;9(1):5. doi: 10.1186/1472-6963-9-5. PubMed PMID: 19134202. PubMed Central PMCID: PMC2628658.
28. Gusdal AK, Obua C, Andualem T, Wahlström R, Chalker J, Fochsen G, et al. Peer counselors' role in supporting patients' adherence to ART in Ethiopia and Uganda. *AIDS care*. 2011;23(6):657-62. doi: 10.1080/09540121.2010.532531. PubMed PMID: 21347887.
29. Nyamutera K. Health workers around the world: The Congo. *British Journal of Healthcare Assistants*. 2010;4(10):477-.

- 1
- 2
- 3
- 4 30. Assan A, Takian A, Hanafi-Bojd AA, Rahimiforoushani A, Nematolahi S. Knowledge, attitude, and  
5 practice about malaria: Socio-demographic implications for malaria control in rural Ghana. 2017;  
6 38(4):445-463. doi: 10.1057/s41271-017-0088-6. PubMed PMID: 28883528
- 7 31. Hafeez A, Mohamud BK, Shiekh MR, Shah SAI, Jooma R. Lady health workers programme in  
8 Pakistan: challenges, achievements and the way forward. JPMA: Journal of the Pakistan Medical  
9 Association. 2011;61(3):210. PubMed PMID: 21465929
- 10 32. Roberts M, Hsiao W, Berman P, Reich M. Getting health reform right: a guide to improving  
11 performance and equity: Oxford university press; 2003.
- 12 33. Wilsford D. States facing interests: struggles over health care policy in advanced, industrial  
13 democracies. Journal of Health Politics, Policy and Law. 1995;20(3):571-613. PubMed PMID:  
14 8530769
- 15 34. Buse K, Hawkes S. Health in the sustainable development goals: ready for a paradigm shift?  
16 Globalization and health. 2015;11(1):1. doi: 10.1186/s12992-015-0098-8.  
17 PubMed PMID: 25890267 PubMed Central PMCID: PMC4389312
- 18 35. Martinez J, Ro M, William Villa N, Powell W, Knickman JR. Transforming the delivery of care in  
19 the post-health reform era: what role will community health workers play? American Journal of  
20 Public Health. 2011;101(12):e1-e5. doi: 10.2105/AJPH.2011.300335. PubMed PMID: 22021289  
21 PubMed Central PMCID: PMC3222444.
- 22 36. Harrison MI. Implementing change in health systems: market reforms in the United Kingdom,  
23 Sweden and the Netherlands: Sage; 2004.
- 24 37. Javanparast S, Baum F, Labonte R, Sanders D. Community health workers' perspectives on their  
25 contribution to rural health and well-being in Iran. American journal of public health.  
26 2011;101(12):2287-92. doi: 10.2105/AJPH.2011.300355. PubMed PMID: 22021303  
27 PubMed Central PMCID: PMC3222427
- 28 38. Inglehart R, Welzel C. Modernization, cultural change, and democracy: The human development  
29 sequence: Cambridge University Press; 2005.
- 30 39. Van Lerberghe W. The world health report 2008: primary health care: now more than ever:  
31 World Health Organization; 2008.
- 32 40. Organization WH. The world health report 2000: health systems: improving performance: World  
33 Health Organization; 2000.
- 34 41. Organization WH. The world health report 2006: working together for health: World Health  
35 Organization; 2006.
- 36 42. Tangcharoensathien V, Mills A, Palu T. Accelerating health equity: the key role of universal  
37 health coverage in the Sustainable Development Goals. BMC medicine. 2015;13(1):1.  
38 doi: 10.1186/s12916-015-0342-3. PubMed PMID: 25925656; PubMed Central PMCID:  
39 PMC4415234
- 40 43. Kenny C, Sumner A. More money or more development: what have the MDGs achieved? Center  
41 for Global Development working paper. 2011(278).
- 42
- 43
- 44
- 45
- 46
- 47
- 48
- 49
- 50
- 51
- 52
- 53
- 54
- 55
- 56
- 57
- 58
- 59
- 60

Table 1: List of interviewees and their characteristics &amp; Study settings

| Region                            | Central Region                                                                                                                                                                                                                                                                        | Greater Accra Region                                                                                                                                                                             | Upper East Region                                                                                                                                                                                           | Volta Region                                                                                                                       | Total     |
|-----------------------------------|---------------------------------------------------------------------------------------------------------------------------------------------------------------------------------------------------------------------------------------------------------------------------------------|--------------------------------------------------------------------------------------------------------------------------------------------------------------------------------------------------|-------------------------------------------------------------------------------------------------------------------------------------------------------------------------------------------------------------|------------------------------------------------------------------------------------------------------------------------------------|-----------|
| <b>Levels</b>                     |                                                                                                                                                                                                                                                                                       |                                                                                                                                                                                                  |                                                                                                                                                                                                             |                                                                                                                                    |           |
| <b>National Level</b>             | Head of CHPS (1), Head of monitoring and evaluation (1), other senior officials (2) at Policy, Planning, Monitoring and Evaluation unit at the Ministry of Health, and Renowned researcher on CHPS (1).                                                                               |                                                                                                                                                                                                  |                                                                                                                                                                                                             |                                                                                                                                    | 5         |
| <b>Region Levels</b>              | <i>Cape Coast</i><br>Deputy regional director for health administration and support services (1); Regional director for public health (1); Senior public health nurse (1); Head of service training (1); Regional health information officer (1); Regional human resource manager (1) | <i>Accra</i><br>Regional CHPS coordinator & deputy director of nursing services (1)                                                                                                              | <i>Bolgatanga</i><br>Regional CHPS coordinator (1); Senior reproductive and Child Health (RCH) (1); Information officer (1)                                                                                 | <i>Ho</i><br>Regional CHPS coordinator (1)                                                                                         | 11        |
| <b>District /Municipal Levels</b> | <i>Assin North District</i><br>Municipal health director (1)<br>Municipal CHPS coordinator (1)<br>Municipal nutrition technical officer (1);<br>Community mental health officer (1)                                                                                                   | <i>Kone Katamanso District</i><br>District health director (1)                                                                                                                                   | <i>Bolgatanga Municipal &amp; Kassena Nankana West District</i><br>Municipal CHPS coordinator (1); District CHPS coordinator (1); Nursing officer (1)                                                       | <i>Ho municipal</i><br>Municipal CHPS coordinator (1)                                                                              | 9         |
| <b>Sub-district/ Local levels</b> | <i>Assin Endwa CHPS compound</i><br>Community health nurse (CHN) (1); Head of facility (1); Enrolled nurses(EN) (1); Community health management committee (CHMC) – Traditional leader (chief) (1), Assembly member (1); Other opinion leaders (2)                                    | <i>Appolonia CHPS compound</i><br>General nurse (1); CHN (1); Midwife (1); EN (1); Nursing officer (1); CHMC – Traditional committee members (2), Assembly member (1); Other opinion leaders (3) | <i>Yikene &amp; Nania CHPS compound</i><br>CHN (1); EN (2); CHO (2); CHW (3); Midwife (1); CHMC – (Traditional leader (chief) (1), Religious leader (1), Assembly member (1), Community youth volunteer (2) | <i>Loboli &amp; Atikpui CHPS compound</i><br>EN (3); Head of facility (2); CHOs (2); CHW (2); CHMC - Community youth volunteer (1) | 42        |
| <b>Total</b>                      | 17                                                                                                                                                                                                                                                                                    | 13                                                                                                                                                                                               | 20                                                                                                                                                                                                          | 12                                                                                                                                 | <b>67</b> |



## Universal health coverage through the community-based health planning and services initiative in Ghana: Hurdles to overcome

### Standards for Reporting Qualitative Research (SRQR)

| No. | Topic                                                                                        | Item (Refer Page No.) |
|-----|----------------------------------------------------------------------------------------------|-----------------------|
| S1  | Title                                                                                        | Page: 1               |
| S2  | Abstract                                                                                     | Page: 2,3             |
|     | <b>Introduction</b>                                                                          |                       |
| S3  | Problem formulation                                                                          | Page: 4, 5            |
| S4  | Purpose or research question                                                                 | Page: 5               |
|     | <b>Methods</b>                                                                               |                       |
| S5  | Qualitative approach and research paradigm                                                   | Page: 5,6             |
| S6  | Researcher characteristics and reflexivity                                                   | Page: 5, 6            |
| S7  | Context                                                                                      | Page: 5, 20           |
| S8  | Sampling strategy                                                                            | Page: 5,6             |
| S9  | Ethical issues pertaining to human subjects                                                  | Page: 7               |
| S10 | Data collection methods                                                                      | Page: 5,6             |
| S11 | Data collection instruments and technologies                                                 | Page: 5,6             |
| S12 | Units of study                                                                               | Page: 5,6             |
| S13 | Data processing                                                                              | Page: 6               |
| S14 | Data analysis                                                                                | Page: 6               |
| S15 | Techniques to enhance trustworthiness                                                        | Page: 3, 4, 5,6       |
|     | <b>Results/findings</b>                                                                      |                       |
| S16 | Synthesis and interpretation                                                                 | Page: 7,8,9,10,11,12  |
| S17 | Links to empirical data                                                                      | Page: 7,8,9,10,11,12  |
|     | <b>Discussion</b>                                                                            |                       |
| S18 | Integration with prior work, implications, transferability, and contribution(s) to the field | Page: 12,13,14,15,16  |
| S19 | Limitations                                                                                  | Page: 3,4             |
|     | <b>Others</b>                                                                                |                       |

|     |                       |         |
|-----|-----------------------|---------|
| S20 | Conflicts of interest | Page: 2 |
| S21 | Funding               | Page: 2 |

For peer review only



# BMJ Open

## Challenges to achieving universal health coverage through community-based health planning and services delivery approach: a qualitative study in Ghana

|                                 |                                                                                                                                                                                                                                                                                                                                                                                                                                                               |
|---------------------------------|---------------------------------------------------------------------------------------------------------------------------------------------------------------------------------------------------------------------------------------------------------------------------------------------------------------------------------------------------------------------------------------------------------------------------------------------------------------|
| Journal:                        | <i>BMJ Open</i>                                                                                                                                                                                                                                                                                                                                                                                                                                               |
| Manuscript ID                   | bmjopen-2018-024845.R1                                                                                                                                                                                                                                                                                                                                                                                                                                        |
| Article Type:                   | Research                                                                                                                                                                                                                                                                                                                                                                                                                                                      |
| Date Submitted by the Author:   | 11-Oct-2018                                                                                                                                                                                                                                                                                                                                                                                                                                                   |
| Complete List of Authors:       | Assan, Abraham ; Tehran University of Medical Sciences, Health Management and Economics; Global Policy and Advocacy Network (GLOOPLAN)<br>Takian, Amirhossein; Tehran University of Medical Sciences, School of Public Health, Global Health & Public Policy; Health Equity Research Centre (HERC)<br>Aikins, Moses; University of Ghana, School of Public Health<br>Akbari Sari, Ali; Tehran University of Medical Sciences, Health Management and Economics |
| <b>Primary Subject Heading</b>: | Health policy                                                                                                                                                                                                                                                                                                                                                                                                                                                 |
| Secondary Subject Heading:      | Public health, Health services research, Global health, Qualitative research                                                                                                                                                                                                                                                                                                                                                                                  |
| Keywords:                       | Universal Health Coverage, Community Health, Citizens' Engagements, Community-Based Health Planning Services (CHPS) initiative, Ghana                                                                                                                                                                                                                                                                                                                         |
|                                 |                                                                                                                                                                                                                                                                                                                                                                                                                                                               |

SCHOLARONE™  
Manuscripts

# Challenges to achieving universal health coverage through community-based health planning and services delivery approach: a qualitative study in Ghana

---

Abraham Assan<sup>1,2</sup>, Amirhossein Takian<sup>1,3,4\*</sup>, Moses Aikins<sup>5</sup>, Ali Akbari Sari<sup>1</sup>

## Authors' information

**Abraham Assan**<sup>1,2</sup> MPH

<sup>1</sup>Department of Health Management and Economics, School of Public Health, Tehran University of Medical Sciences, Tehran, Iran.

<sup>2</sup>Global Policy and Advocacy Network (GLOOPLAN), Accra, Ghana.

(E-mail: [abrahamassan@yahoo.com](mailto:abrahamassan@yahoo.com)).

**Amirhossein Takian**<sup>1,3,4\*</sup> MD MPH PhD FHEA

<sup>1</sup>Department of Health Management and Economics, School of Public Health, Tehran University of Medical Sciences, Tehran, Iran.

<sup>3</sup>Department of Global Health and Public Policy, School of Public Health, Tehran University of Medical Sciences, Tehran, Iran.

<sup>4</sup>Health Equity Research Centre (HERC), Tehran University of Medical Sciences (TUMS), Tehran, Iran. (E-mail: [takian@tums.ac.ir](mailto:takian@tums.ac.ir) & [takiana@gmail.com](mailto:takiana@gmail.com)).

**Moses Aikins**<sup>5</sup> PhD

<sup>5</sup>University of Ghana, College of Health Science, School of Public Health, P. O. Box LG 13, Legon. (E-mail: [mksaikins@ug.edu.gh](mailto:mksaikins@ug.edu.gh)).

**Ali Akbari Sari**<sup>2</sup> PhD

<sup>2</sup>Department of Health Management and Economics, School of Public Health, Tehran University of Medical Sciences, Tehran, Iran. (E-mail: [akbarisari@tums.ac.ir](mailto:akbarisari@tums.ac.ir)).

## Funding

This work was supported by Tehran University of Medical Sciences grant number 9413476002, and Global Policy and Advocacy Network (GLOOPLAN), Ghana.

## Authors' contribution

AA conceived the study, served as the principal investigator, and drafted the manuscript. AT contributed to the conception of the study, supervised the entire process of design, data interpretation and analysis, and the intellectual development of the manuscript. He is the guarantor. MA also contributed to the conception of the study, assisted in data collection and development of the manuscript, and technically reviewed the article. AAS facilitated and contributed to the intellectual development of the paper.

## Acknowledgements

Authors wish to acknowledge the Ministry of Health-Ghana and the Ghana Health Service, and our study participants for their cooperation. We specially thank Dzigbodi K. Hosi, Desmond Otsiabah, Juliet Letsu, Ibrahim Muctar, Francisca Korsaa, Leonard Leonie Sumabe, Isaac Assan, Emmanuel Nana Asare Bempong, and Latif Baako for supporting the study.

## Conflicts of interest

None declared

## Abstract

**Objective:** Community-based initiatives have enormous potential to facilitate the attainment of universal health coverage (UHC) and health system development. Yet, key gaps exist and threaten its sustainability in many low-middle income countries. This study is first of its kind (following the launch of the Sustainable Developments Goal (SDGs)) that aimed to holistically explore the challenges to achieving UHC through the community-based health planning and service initiative (CHPS) in Ghana.

**Design:** Qualitative study design was adopted to explore the phenomenon. Face-to-face in-depth interviews were conducted from April 2017 until February 2018, through purposive and snowball sampling techniques. Data was analyzed using inductive and deductive thematic analysis approach.

**Setting:** Data was gathered at the national level, in addition to the regionals, district and sub-district /local levels of four regions of Ghana. Sampled regions were: Central Region, Greater Accra Region, Upper East Region, and Volta region.

**Participants:** In total, 67 participants were interviewed – national level (5), regional (11), district(9), and the local levels(42). Interviewees were mainly stakeholders – people whose actions or inactions actively or passively influence the decision-making, management, implementation of CHPS, including: policy makers,

1  
2  
3 managers of CHPS compound and health centers, politicians, academics, health professionals, technocrats,  
4 and community health management committee members.  
5

6  
7 **Results:** Based on our findings, inadequate understanding of CHPS concept; major contextual changes with  
8 stalled policy change to meet growing health demands; and changes in political landscape and leadership  
9 with changed priorities, threatens CHPS sustainability.  
10

11  
12 **Conclusion:** UHC is a political choice which can only be achieved through sustainable and coherent efforts.  
13 Along countries' pathway to reach UHC, coordinated involvement of all stakeholders, from community  
14 members to international partners is essential. To achieve UHC within the time frame of SDGs, Ghana has  
15 no choice than to improve its national health governance, to strengthen the capacity of existing CHPS.  
16  
17

18  
19 **Keywords:** Universal Health Coverage (UHC), Community Health, Citizens' Engagements, Community-  
20 Based Health Planning Services (CHPS) initiative, Ghana.  
21  
22

### 23 24 **Strengths and limitations of this study**

- 25 ➤ The stratified data collection strategy, and the variety of study participants from across different levels  
26 and settings helped gain a broader understanding of the phenomenon.  
27
- 28 ➤ Our framework enabled us to accommodate a wide range of disciplines for pragmatic interpretation  
29 of the phenomenon, by exploring different components of the CHPS initiative.  
30
- 31 ➤ To enhance the credibility of our study, we explored the phenomenon through various lenses  
32 (ensuring triangulation), performed member check, ensured transparency of methods and analysis,  
33 and involved multi researchers from different background.  
34
- 35 ➤ Although this study is the first of its kind and has used a robust methodology, we cannot be certain  
36 of participants' underlying rationale for responding, especially with regards to their political,  
37 institutional and societal commitments towards the initiatives – hence, like any qualitative study, our  
38 findings need to be interpreted with some caution.  
39  
40  
41  
42  
43  
44

### 45 **Introduction**

46 Today, a big proportion of health policy debate is focused on accomplishing the 2030 Sustainable  
47 Development Agenda – a milestone which places specific importance on universal health coverage (UHC)  
48 – a concept which supports a collective credence that all people should have access to the health services  
49 they need without risk of financial ruin or impoverishment. (1) Nonetheless, considering the existing  
50 disparities within countries, achieving UHC will require all-inclusiveness and participatory interactions  
51  
52  
53  
54  
55  
56  
57

1  
2  
3 between health systems and the citizens. (2-4) As a result, community health system performance has  
4 become increasingly relevant to both high and low-middle income countries (LMIC).  
5  
6

7 Ghana, in 2000, launched the community-based health planning and service (CHPS) initiative to facilitate  
8 the achievement of the vision based on the premise that UHC can be achieved if improved health services  
9 are delivered closer to the door-step of community members, particularly to those at the rural and slummy  
10 areas. Under this initiative, community health professionals, supported by community volunteers are trained  
11 to provide health care in a CHPS zone (geographical coverage areas for community health services –  
12 presently, about 5487 zones in number). (5) Key service package includes: maternal and reproductive  
13 health, child health services, treatment of minor ailments, health education and promotion of healthy  
14 lifestyles and follow-up on clients. (6, 7)  
15  
16  
17  
18  
19

20 CHPS has created one of the best approaches in increasing community commitments and ownership  
21 towards health system strengthening, enhancing equitable access and delivery of primary healthcare, and  
22 resources mobilization. (8) Yet, many challenges persist and threatens the successes and sustainability of  
23 the initiative, including: inadequate financial resources, poor management and supervision of programmes,  
24 insufficient health infrastructure, physical inaccessibility, inadequate trained community health workforce,  
25 high attrition rate, socio-cultural beliefs and poor referral system. (9) In this study, we aimed to enhance  
26 the understanding of the challenges limiting the effective role of CHPS in contributing to achieving UHC  
27 in Ghana. We used a theoretical framework (the Walt and Gilson's policy triangle) to guide the  
28 interpretation of findings. This research is the first of its kind. We anticipate that our findings could facilitate  
29 the achievements of Sustainable Development Goals, UHC in particular, in Ghana, and perhaps many other  
30 LMICs.  
31  
32  
33  
34  
35  
36  
37  
38  
39

## 40 **Methods**

### 41 **Study design, Settings, Sampling and Data collection**

42 The qualitative study design was used to explore the phenomenon. The study was conducted in four regions  
43 of Ghana, to represent diversity in terms of socioeconomic status, cultural, religion, geographical position,  
44 and level of performance of CHPS in the country. (6, 10, 11) Sampled regions were: Central Region, Greater  
45 Accra Region, Upper East Region (UER), and Volta region. Data was gathered at four levels – national,  
46 regional, district and local levels to ensure triangulation. (12) A purposive and snowball sampling  
47 techniques was employed to identify study participants at the national and the regional levels. (13) At the  
48 districts and the local levels, participants were sampled through the snowball technique. (14) Three  
49 university graduates with experience in research were recruited and trained to assist in data collection.  
50  
51  
52  
53  
54  
55  
56  
57  
58  
59  
60

1  
2  
3 Training lasted for three days. Pre-testing of data collection instruments was done during the training  
4 session.  
5

6  
7 Face-to-face in-depth interviews were conducted from April 2017 until February 2018. Interviews were  
8 conducted in English. Separate semi-structured interview guides were designed for interviews at each level.  
9  
10 Data was gathered until saturation – where we realized no new data was emerging. (15) Interviews lasted  
11 between 25 – 45 minutes. In total, 67 participants were interviewed – national level (5 interviewees),  
12 regional (11 interviewees), district (9 interviewees), and the sub-district / local levels (42 interviewees) –  
13 refer table 1 for list of interviewees and their characteristics and study settings. Interviewees were mainly  
14 stakeholders – people whose actions or inactions actively or passively influence the decision-making,  
15 management, implementation of CHPS. They include; policy makers of the CHPS initiative, managers of  
16 CHPS compound and health centers, politicians, academics, health professionals, technocrats, and  
17 community health management committee members. Addition to the interviews were documents review  
18 and observation.  
19  
20  
21  
22  
23

#### 24 25 Data analysis

26 All interviews were audio recorded. Data gathered was transcribed verbatim. Coding was done manually.  
27 We used Walt and Gilson's policy triangle to guide data analysis. This framework was selected because it  
28 has influenced health policy research in a diverse array of countries, and has been used to analyze several  
29 health issues and health sector reform – which is appropriate in the context of our study. The framework  
30 enabled us to explore the perspectives of the different components of the CHPS initiative, regarding how  
31 the content of policy, neglecting actors, context and processes interact to shape policy-making (16).  
32  
33 Further, we remained open to accommodate other emerging themes – hence we employed the hybrid  
34 interactive processes of inductive and deductive thematic analysis to interpret our data. (17)  
35  
36  
37  
38  
39

40 Codebooks were developed, and themes that emerged from the data were repeatedly reviewed using the  
41 research questions. To enhance trustworthiness of findings, two research members (AA, MA) were assigned  
42 to do first coding (open breakdown of themes). This enabled us to identify all prevailing themes in the  
43 study. Next, (AT, AAS) created inter-code connections among themes. Relevant codes which were  
44 associated with study objectives were extracted, compared and discussed among members. Similarities and  
45 differences between codes were also addressed. (18)  
46  
47  
48  
49

50 Next, through thorough content analysis, we interpreted the categorized themes which were relevant to the  
51 accomplishment of the objectives of the study. That is, we read the documents and transcripts repeatedly  
52 (got immersed with the data), performed member checks, and coded them inductively and deductively,  
53 followed with iterative analysis. This enabled us to understand, interpret extracted themes, which were  
54  
55  
56  
57

1  
2  
3 centered on, and relevant to the CHPS initiative. Finally, core categorical themes were selected, analyzed  
4 and compared with existing literature to ensure the reliability, validity and comprehensiveness of our  
5 findings (Selective coding). (18) Final codes were developed based on consensus of the entire research  
6 team (AS, AT, MA, AAS).  
7  
8  
9

### 10 Ethical Considerations

11 This study was first approved by the ethics committee of Tehran University of Medical Sciences (code:  
12 IR.TUMS.VCR.REC.1395.1699), followed by the Ghana Health Service Ethical Review Committee  
13 (registration number: GHS-ERC: 08/03/2017). We also obtained written permission from the regional and  
14 district levels of all study settings, before commencing data collection. Further, we acquired written consent  
15 from all participants and guaranteed them of their privacy, confidentiality and anonymity of any information  
16 they provide. Participation was voluntary, and without any compensation. Participants were given the right  
17 to opt out from the study at any point.  
18  
19  
20  
21  
22

### 23 Patient and Public Involvement

24 This qualitative study focused on a nominated public health initiative (CHPS) through the lenses of policy,  
25 whose participants were mainly policy makers, managers and the representatives of the public, who were  
26 not conventionally classified as patients recruited for medical research. Nonetheless, the key actors were  
27 widely consulted in the development of the research questions and in assessing the implications of the  
28 findings. Further, findings will be disseminated through stakeholders' events (including one-on-one policy  
29 talk show) to enhance the significance and salience of findings.  
30  
31  
32  
33  
34  
35

### 36 Results

37 The Community-based Health Planning and Service (CHPS) initiative was found in 2000 to facilitate the  
38 achievement of Universal Health Coverage (UHC), by providing improved health services, mainly  
39 preventive, promotive and treatments of minor ailments closer to the door-step of community members,  
40 particularly to those at the rural areas – efforts aimed to address geographical barriers to health. Although,  
41 CHPS has created one of the best approaches in increasing communities' commitments towards health  
42 system strengthening, its performance has declined over the years. According to our findings, inadequate  
43 understanding of CHPS concept; major contextual changes with stalled policy change to meet growing  
44 health demands; changes in political landscape and leadership with changed priorities – threatens CHPS  
45 sustainability.  
46  
47  
48  
49  
50  
51  
52  
53

#### 54 1. Inadequate understanding of the CHPS concept

55  
56  
57



1  
2  
3 CHPS has been in existence for almost seventeen years. Yet, the concept of CHPS has not been fully gripped  
4 by the major stakeholders, most importantly, political institutions and community members. To achieve  
5 universal access to healthcare in Ghana, CHPS remain ideal – serving as a vehicle not just for delivering  
6 health care, but to the very door step of the client. Nonetheless, according to our findings, major actors  
7 operate but at varying degrees to achieve personal interests – not necessarily to contribute to achieving the  
8 key mandate of CHPS. That is, political bodies, through active collaboration with District Assemblies  
9 construct CHPS compounds for political gains – i.e. to solicit for votes, sometimes without even consulting  
10 the health directorate. As a result, most CHPS structure do not meet the required building plan, while others  
11 are not strategically situated to address the geographical barriers to accessing health care – a primary goal  
12 the initiative seek to achieve.

13  
14  
15  
16  
17  
18  
19 *“In fact, I should state that some stakeholders don’t really understand the role as far as CHPS initiative*  
20 *is concern. Politicians one way or the other think we should construct CHPS compounds where they had*  
21 *won votes. Some even go to the extent of constructing CHPS facility without prior consultation from the*  
22 *health directorate, which at the end are not being patronized by the clients because it may be either at the*  
23 *outskirt of the town where health officers find it difficult to reside there or where it’s too far from*  
24 *clients”.* – Municipal Health Director, Central region  
25  
26  
27  
28  
29

30 Our findings also revealed the community entry processes were not properly carried-out from the onset –  
31 influencing many implementation flaws. For example, community members routinely demand of services  
32 which do not form part of the service package of CHPS, and often beyond the capabilities of the  
33 community health professions. That is, communities consider CHPS to be a health centre or a hospital,  
34 hence, expect health professionals to be able to provide a more comprehensive service.  
35  
36  
37

38 *“the concept of CHPS is still not well understood by a bigger session of the community – clients today*  
39 *still perceive that when you talk of health, it is getting sick and being treated. They least understand the*  
40 *CHPS concept emphasizes more on health promotion and prevention. Due to that, you may get up in the*  
41 *morning with plans to go for home visit (for health talk) just to find clients in queues demanding for*  
42 *medical treatments – services which we are not even permitted to render. I think once the people know*  
43 *that the policy is to prevent them from being sick, then of course, they won’t wait till they are sick and*  
44 *then be running to the health facilitates.* – Community Health Officer, Upper East Region  
45  
46  
47  
48  
49

50 Again, members of the community were not made to fully understand that CHPS is community-driven  
51 and therefore it successes greatly depends on the community. Community members were of the belief that  
52 the government should be solely responsible for the total establishments and management of CHPS. In  
53 view of that, there is a growing perception that CHPS is a strategy used by the government to shift their  
54  
55  
56  
57



1  
2  
3 core responsibilities to its citizens – given that the initiative is community-induced. Besides, as observed,  
4 majority of amenities of most facilities were either provided by the community and non-governmental  
5 organizations (especially the international donors).  
6

7  
8 *“We have been convinced to build our own health facility, advocate for the provision of health amenities*  
9 *and logistics, and pay our utilities, what then is the role of the government if health development of a*  
10 *community is to be exclusively provided by the community?”* – Community Leader, Greater Accra Region  
11  
12  
13

## 14 **2. Major contextual changes, with ensuing stalled policy change to meet growing demands**

15 CHPS is currently faced with major contextual changes, with ensuing stalled policy changes to address  
16 current health needs and expectations of the communities – mainly due to inadequate dedicated resources  
17 to sustain the initiative, and rigid organizational framework.  
18

19 Over a decade ago, people were travelling long distances to access health and therefore there was the need  
20 to send services to the rural areas, through which CHPS was originally birthed to primarily provide  
21 services at the door-steps of households. CHPS compounds were strategically erected in selected  
22 communities to facilitate service provision – where community health professionals were tasked to  
23 provide door-to-door services to communities including those without a CHPS compound. Nevertheless,  
24 today, despite being a national policy for all electoral areas to have a CHPS compound, almost all  
25 communities demand CHPS compound to be constructed in their communities – many of which are even  
26 putting up structures without governments support. However, according to our study, the existence of a  
27 “physical CHPS structure” has implied increasing health demand by community members – as clients  
28 perceive it as a hospital. Hence, the present demand and expectations of communities extend beyond the  
29 services package of CHPS – which is mainly preventive, promotive and treatment of minor ailment.  
30 Based on our findings, community members upon constructing a CHPS compound would want CHPS to  
31 function as a health center or a hospital, and demand for extra health departments especially maternal  
32 health units – aspirations which are barely difficult to peruse considering the aim of CHPS. Besides, the  
33 rising health demands and the willingness of communities to expand the service package of CHPS exacts  
34 much pressure on the governments – largely due to unplanned resources to sustain the initiative. As a  
35 result, CHPS facilities lack basic logistics and medicines needed to treat minor ailments. This has led to  
36 rampant referral of health cases to either the health centre or the hospital. Yet, neither of the CHPS  
37 compounds across all the regions even had an ambulance to facilitate referral processes. Health  
38 professionals had to rely on commercial vehicles and motorcycles during referrals, and even with that,  
39 aside not appropriate for referrals, these vehicles are often either far away from CHPS compounds to  
40 render immediate service or clients don’t have the money to pay for the fare, leaving the financial burden  
41 on the health professionals.  
42  
43  
44  
45  
46  
47  
48  
49  
50  
51  
52  
53  
54  
55  
56  
57

1  
2  
3  
4  
5 “...CHPS is expanding at rate governments are not able to cope. The request for new facilities or units  
6 implies that the government need to increase the provisions for logistics, employ more staffs, pay workers  
7 their remunerations etc. Meanwhile, the budget for the sector is not growing at a rate we are expected to  
8 spread our services. Yes, our main objective is to improve access, but we are limited due to inadequate  
9 resources” – Senior Policy Maker (National Level)  
10  
11  
12  
13

14 Moreover, improved knowledge is changing health practices especially among urban residents. Yet, CHPS  
15 is faced with inadequate resources for capacity building of community health professionals, to fully meet  
16 health needs and expectations, to match the changing health practices of their clients. To this end, urban  
17 residents especially evinced a negative attitude towards community health professions (particularly health  
18 volunteers), questioning their credibility to educate them about health.  
19  
20  
21  
22

23 “I was first working in a rural community, but we were recently reshuffled and was posted to the city.  
24 Fairly speaking, I prefer to work in the rural areas. You see my entire work is to promote health or  
25 educate the community about health. But within the city, the residents are knowledgeable. Some even  
26 refuse to listen to our health talk because they feel they are well informed even than the community health  
27 experts. Besides, they get any information they need on the internet. But working as a health officer in the  
28 rural areas is quite a different. I remember when I was first posted to my previous workplace (village),  
29 the entire community was exceedingly glad to have us. But in the city, in fact their responses to our  
30 questions are something demoralizing. I think, the training that I acquired was very useful to me when I  
31 was working in the village but the situation in the city is quite different”. – Community Health Officer,  
32 Volta region  
33  
34  
35  
36  
37  
38

39 Additionally, seventeen years ago, it might be relatively easier to reach all community members or  
40 villagers in person and in groups. According to our study, health professionals lack the appropriate  
41 mobilization skills to successfully organize health durbars. Again, there is a limited use of digital tools in  
42 ensuring that community members irrespective of place and time do have consistent access to health  
43 information. Further, while volunteerism was found fundamental in CHPS sustainability, the concept  
44 although is properly understood by community members, the idea has been met with strong resistance  
45 where volunteers today demand salaries for their services. According to volunteers, “it is very  
46 discouraging getting up every morning for work and at the end of the month you end up receiving no  
47 salary. I have been a community volunteer for over 15 years, yet I cannot boast of significant reward for  
48 my work. I understand I volunteered for this kind of work but mind you I also have families”.  
49  
50  
51  
52  
53  
54  
55  
56  
57

1  
2  
3 “Currently, it is difficult mobilizing community members for health durbars. Most of them are engaged with  
4 economic activities – hence leave very early for farms (work) and return late. Also, community participation  
5 was initially stronger because we had active volunteers supporting our work. But today, volunteerism is no  
6 more, and is really affecting our work”. – Community Health Officer, Upper East region  
7  
8  
9

### 10 **3. Changes in the political landscape and leadership with changed priorities**

11 Complex interactions of actors were found to have a critical influence on CHPS. To our participants,  
12 although a broader political process is required for CHPS sustainability, recent commitments of political  
13 bodies towards CHPS are not up to expectation. Every government comes with its own priorities – nobody  
14 continues from where the previous government ended. What governments commonly done is to construct  
15 CHPS compounds – leaving behind provision of logistics – since the number of compounds built is often  
16 considered as major political achievements. Also, although, our study revealed a more prevailing  
17 commitment by the community members and the international donors to improve CHPS, while  
18 communities lack the needed resources to sustain the initiative, policy inconsistency also threatens the  
19 sustainability of projects pursued by international donors. That is, these international bodies mostly  
20 implement pilot projects for a stipulated time and then leave, but who to commit to the course left behind  
21 and provide the desired resources to sustain the initiative is a challenge which retards the progress of CHPS.  
22  
23  
24  
25  
26  
27  
28  
29

30 “CHPS is more a political tool now – it is just on the lips of our politicians. They promise a lot but  
31 deliver little. When it comes to logistics often rely on donor partners who mostly come to pilot projects for  
32 a stipulated time and then leave. But whether such projects are sustained is another issue because when  
33 they pull-out who to continue from wherever they ended is also a unique challenge altogether.  
34  
35 Nonetheless, if the leaders are so vibrant and active, you see them going in and out sourcing for funding  
36 to sustain the initiative. But you wouldn't see that in places where the leaders do not believe in the  
37 concept of CHPS. So, there will be a bit of variation in the level of performance depending on who for  
38 example is the head, and more to the point where the developing partners seek to work. This is part of the  
39 reason why some regions have several partners helping to improve CHPS, and otherwise. So, that might  
40 resort to a bit of disparity in performance, but when you talk about challenges faced by the initiative due  
41 to governmental commitments, then that tends to be a countrywide challenge”. – Renowned Researcher  
42 on CHPS  
43  
44  
45  
46  
47  
48  
49

50 Furthermore, we found communities' independent efforts being driven by loss of trust in the Governments  
51 to fully provide their health needs. To the community members, Governments have shown inadequate  
52 exertion to provide CHPS compounds the basic resources. Hence, any initiative where communities can  
53 lead the forefront of their development and not to always rely on the government is worthy to embrace. In  
54  
55  
56  
57

1  
2  
3 view of that, community leaders and members with improved understanding of the CHPS concept  
4 independently exhibited vigorous efforts towards issues of health and development.  
5

6  
7 *“We never waited for the Ghana Health Service to inform us that we are due for CHPS compound. That*  
8 *would have taken a long time, considering the political processes involved. The community has formed an*  
9 *alliance with a UK based Trust that support our development. So, we proposed to them to also support*  
10 *the establishment of our facility, and over five years the community has also been contributing to pay the*  
11 *utilities of the facility.”* – Traditional Leader (community Chief), Central region  
12  
13  
14

15  
16 On the other hand, where there were chieftaincy disputes, key stakeholders (especially traditional leaders)  
17 oppose decision-making processes and program implementation. As an example, we observed low  
18 community participation in communities facing chieftaincy and land disputes, or without a chief – since  
19 health professionals find it difficult identifying which leader to consult to serve as a focal point to engage  
20 its citizens. Also, due to lack of consensus, family members and friends of opposing leaders also refuse to  
21 attend programs being organized for the community.  
22  
23  
24

25 *“Communities are encountering series of chieftaincy and land disputes. As a result, you may organize a*  
26 *health durbar in one community, and it will interest you to know that part of the community members will*  
27 *deliberately not attend, expecting a separate durbar to be conducted for them. The reason being that,*  
28 *opposing leaders would want to be also recognized and treated as community heads. Unlike elsewhere,*  
29 *where you find out that a community has just one chief (leader) who perhaps may serve as the head of the*  
30 *CHPS zone to engage its citizens”*. – Community Youth Volunteer, Volta region  
31  
32  
33  
34  
35

## 36 Discussion

37  
38 The Alma-Ata Declaration of 1978 identified the role of a comprehensive primary health care (PHC) as  
39 the cornerstone to any sustainable health system. Now, in its 40<sup>th</sup> anniversary, while the philosophy of  
40 PHC is valid more than ever, the development of PHC-based healthcare delivery has received a paradigm  
41 shift towards the deployment of several forms of community health workers (CHWs) – as cadres capable  
42 of delivering effective care at the least cost, at the community and household levels. (19)  
43  
44  
45

46  
47 Social mobilization and community participation need to be at the centre of health policy planning and  
48 implementation to achieve UHC in any setting. Ultimately, the efficiency of the community health  
49 volunteers and managers (including community health management teams) through regular capacity  
50 building and constant training for building more effective and responsive systems to adapt the dynamic  
51 changing health needs, are the keys to the success of community-based programme. Well-designed  
52 community-driven initiatives have proved capable of establishing a more substantial means in addressing  
53  
54  
55  
56  
57

1  
2  
3 crippling PHC system in several LMICs. For instance, addressing shortage and poor distribution of  
4 various health workers and encouraging them to choose to practice in rural and underserved areas,  
5 expanding and strengthening coverage of key health programs, and re-organizing health workforce to  
6 address challenges pertaining to low access to quality, people-centered, affordable and acceptable health  
7 care services, can be mentioned (19) The “Behvarz” of Iran, the village health volunteers in Thailand,  
8 the lay health workers in Pakistan, the health extension workers in Ethiopia, the BRAC community in  
9 Bangladesh, are all successful community-based models (20), which have contributed immensely towards  
10 programs focused on maternal, neonatal, child health care and development, and reproductive health.  
11  
12  
13  
14  
15

16  
17 Yet, even in countries with proved and meaningful success, key challenges continue to threaten the  
18 sustainability of such initiatives. Community-based necessitate active engagements of actors. However,  
19 often, stakeholders operate without robust mechanism for coordination, which may hinder achieving the  
20 intended purposes. As our study reveals, this challenge might emerge because of inadequate  
21 understanding of the policy content, and the lack of equal cooperation among major actors including  
22 political bodies, donors, the health directorate and the local partners at the district and sub-district levels.  
23 Conflicting stakeholder interests (especially among politicians) have led to a several disorganized national  
24 debate, particularly during establishment or expansion of public health services. (21) Hence, politics and  
25 stakeholders’ engagements matter at each phase of health reform – as existing institutions and interest  
26 groups often have both the reasons and the resources to vigorously oppose change, (22) as experienced  
27 for instance by the Iranian health system where medical doctors initially opposed family physician  
28 program in rural Iran due to lack of prior consultation, and understanding of policy content. (14)  
29 Notwithstanding that, community participation in all aspects of policies is essential to enhance  
30 sustainability through country ownership and accountability. (3, 23) Otherwise, promoting local  
31 ownership of initiatives would become challenging, as it happened in Brazil. (24)  
32  
33  
34  
35  
36  
37  
38  
39  
40  
41  
42

43 The key to attaining UHC through community-based programs is the ability of global, national and local  
44 partners to ensure much policy flexibilities, especially at the local levels. (20) However, our research  
45 revealed that the CHPS initiative is increasingly becoming complex and difficult to manage, due to its  
46 openness to change and the increasing diversity of demand and expectations of clients. Any pressing  
47 demand is considered critical and a potential target for reform, although it might not be strategic  
48 implementing such initiative at that level of care. As an example, the increasing demand of maternity unit  
49 has raised varying views among stakeholders as to whether all CHPS facilities need to have a delivery  
50 ward, or clients should be referred to the next level of care. Worse still, the component of minor  
51 treatments within the service package has rendered the initiative less effective and efficient, and  
52  
53  
54  
55  
56  
57

1  
2  
3 eventually is causing the community members to lose trust in community-based health system. Let alone  
4 that despite the rising demand and expectations, CHPS is challenged with inadequate resources (even  
5 basic logistics) to treat minor ailments, which has led to rampant referrals of health cases and its  
6 associated costs. Hence, we are of the view that CHPS can achieve eloquent results if efforts are geared  
7 towards improving preventive and promotive services – rather than curative care. Besides, due to  
8 inadequate resource allocation by the governments, adding facilities and interventions (a midwifery  
9 delivery department at the facility, in the case of our study) will led to further unanticipated malfunctions  
10 of the system. (25) In addition, as societies modernize and become more affluent and knowledgeable,  
11 what people consider to be desirable ways of living as individuals and as members of societies may  
12 change. (26) Yet, CHPS initiative is faced with lack of resources to help build the capacity of community  
13 health professionals – particularly regarding the use of tools in responding to changes in health practices,  
14 to enhance better community participation and mobilization, as well as efficiency. As a result, clients,  
15 especially the urban residents show negative attitudes towards community health professions (especially  
16 health volunteers), questioning their credibility to even educate them about health. Notwithstanding that,  
17 these challenges could also serve as a platform for change and innovations. Yet, it might also overburden  
18 the international donors and the NGOs – considering the limited political commitments in sustaining the  
19 initiative. This may in turn place immerse strains on communities, particularly the ones with least  
20 resources to support themselves and meet challenges, which may reduce health performance, as happened  
21 in other settings. (26)

22  
23  
24  
25  
26  
27  
28  
29  
30  
31  
32  
33  
34  
35 Generally, the governments' struggle to resolve what they are willing to spend resources on and what clients  
36 want is a fundamental health sector reform dilemma. (27) Many LMICs are faced with the maldistribution  
37 of resources in the face of pressing health needs – where public sector is often perceived as providing  
38 inferior service, and many citizens – even the poor – may have to pay for improved services out of pocket  
39 – resulting to a varying degree of service and health status between urban and rural residents, and the rich  
40 and poor. (21) In this respect, many countries that are even noted for sustainable community-based  
41 programs, maybe affected by the effect of increase in workload on the community health professionals,  
42 which in turn can compromise the quality of health services they provide. (28) Nevertheless, although  
43 resources matter, countries like Cuba has shown that better health chances can be achieved without the best  
44 of resources being available. It is recommended that healthcare financing for dispersed inhabitants often  
45 receive larger per capita expenditure, and in countries with both high-density and low-density populations,  
46 it is expected that dispersed populations receive subsidy to promote equity. (29) In addition, countries are  
47 devising cost-effective innovations that meet the health and well-being of its citizens from an explicitly  
48 multi-sectoral perspective, with a focus on expanding coverage of curative healthcare, while reinforcing  
49  
50  
51  
52  
53  
54  
55  
56  
57



1  
2  
3 promotive strategies and cross-sectoral actions on social determinants of health. (30) Although, that tends  
4 to be expensive, communities can secure such inputs at a manageable cost by joining forces. (31) Our study  
5 revealed that communities that are making meaningful advancement through the CHPS initiative are those  
6 that are either resourced or have leaders constantly negotiating for support from non-governmental  
7 institutions. Further, the use of radio communications has shown successful in overcoming geographical  
8 obstacles to health in such areas, in a more efficient and affordable manner. (29)

9  
10  
11  
12  
13  
14 Community health workers have featured in the discourse of many global public health agenda – by proving  
15 effective in addressing issues that have adverse impact on moving towards UHC. Today, in the era of SDGs,  
16 health is considered a political choice, and everyone’s concern to drive the world to a state where health  
17 must be universal and equitable. (32) Nonetheless, to achieve meaningful results, it is edged that countries  
18 adapt specific targets and actions based on national priorities that promote country ownership and  
19 accountability, (23) – reaffirming the profound role of community-based programs in many LMICs, (33)  
20 including Ghana.

### 21 22 23 24 25 26 27 **Policy recommendations to increase the chances of success**

28  
29 Community-based initiatives are increasingly represented as a potential strategy to strengthen PHC.  
30 Nonetheless, certain vital gaps still impede their progress. Based on our findings, the following are  
31 recommended for community-driven initiatives to better help serve its purposes.

- 32  
33  
34 1. Effective coordination and transparency among actors, particularly, community members, NGO’s,  
35 politicians and the health directorates is eminent to enhance understanding of policy contents and  
36 the ways in which changed priorities or conflicting institutional goals and values could emerge, to  
37 influence intended policy outcome.
- 38  
39 2. There is the need for effective ambulances services to facilitate upward referral of health services  
40 which are beyond the scope of community health professionals.
- 41  
42 3. Stakeholders, especially, academic institutions, the community, and governments, should create a  
43 sustainable framework to improve social determinants of health (SDH), and capacity building on  
44 the effective use of digital tools and community mobilization skills, to shape public health  
45 practices.
- 46  
47  
48  
49

50  
51 Further studies are required to:

- 52  
53 ○ Explore digital tools that can help improve knowledge of community health professionals,  
54 enhance community participation/mobilization and health practices and interventions, and  
55 can foster greater accuracy and efficiency of activities.
- 56  
57

- Identify ways in which factors such as the quality of community health governance and policy coherence can be maximized.
- Investigate ways to provide sustainable community health financing and resource mobilization.

## Conclusion

Universal health coverage is a growing concern and a core target of the SDGs. Nonetheless, considering the existing disparities between and within countries, attaining UHC will necessitate all-inclusiveness, a participatory processes and interactions between health systems and the populations. This has led to a renewed relevance of CHPS in Ghana — an initiative which practically relies on citizen engagement as a central instrument in the delivery of services closer to the door-step of clients, particularly to those at the rural or slummy areas. Despite its recognition in safeguarding communities' commitments and country's ownership to attain UHC, gaps continue to impede its successes. They include: inadequate understanding of the CHPS concept – much of which is due to poor community entry and sensitization programs during the onset of CHPS scale-up. Again, major contextual changes, with ensuing stalled policy change to meet growing demands, and changes in the political landscape and leadership, with changed priorities or opposing forces – all threatens CHPS sustainability. Our study concludes that what is essential to influence positive change for achievements of UHC in Ghana (through CHPS) is the political will – an improved national health governance and the political determinants to lead actions of the community and international donors.

## Data sharing

For extra data contact the corresponding author through [takiana@gmail.com](mailto:takiana@gmail.com).

## Reference

1. Organization WH. The world health report 2013. Research for universal health coverage. Geneva: WHO; 2013. 2014.
2. Smith J. Transnational processes and movements. The Blackwell companion to social movements. 2004:311-35.
3. London L. What is a human-rights based approach to health and does it matter? health and human rights. 2008:65-80. PubMed PMID: 20845830.
4. Takian A, Akbari-Sari A. Sustainable Health Development Becoming Agenda for Public Health Academia. Iranian journal of public health. 2016;45(11):1502. PubMed PMID: 28028502; PubMed Central PMCID: PMC5182259.
5. GHS. Ghana Health Service Annual Report. 2014.



6. Awoonor-Williams JK, Sory EK, Nyongator FK, Phillips JF, Wang C, Schmitt ML. Lessons learned from scaling up a community-based health program in the Upper East Region of northern Ghana. *Global Health: Science and Practice*. 2013;1(1):117-33. doi: 10.9745/GHSP-D-12-00012. PubMed PMID: 25276522; PubMed Central PMCID: PMC4168550.
7. Adongo PB, Phillips JF, Aikins M, Arhin DA, Schmitt M, Nwameme AU, et al. Does the design and implementation of proven innovations for delivering basic primary health care services in rural communities fit the urban setting: the case of Ghana's Community-based Health Planning and Services (CHPS). *Health Research Policy and Systems*. 2014;12(1):1. doi: 10.1186/1478-4505-12-16. PubMed PMID: 24690310; PubMed Central PMCID: PMC3994228.
8. Sakeah E, McCloskey L, Bernstein J, Yeboah-Antwi K, Mills S, Doctor HV. Is there any role for community involvement in the community-based health planning and services skilled delivery program in rural Ghana? *BMC health services research*. 2014;14(1):340. doi: 10.1186/1472-6963-14-340. PubMed PMID: 25113017; PubMed Central PMCID: PMC4251607.
9. MOH. Policy brief of Community-based Health Planning and Services (CHPS)- Ghana. Accessed 23-04-2016 at <http://www.moh-ghana.org/UploadFiles/Publications/policy%20brief%20on%20CHPS2130109060128.pdf>. 2012.
10. Awoonor-Williams JK, Bawah AA, Nyongator FK, Asuru R, Oduro A, Ofosu A, et al. The Ghana essential health interventions program: a plausibility trial of the impact of health systems strengthening on maternal & child survival. *BMC health services research*. 2013;13(2):1. doi: 10.1186/1472-6963-13-S2-S3. PubMed PMID: 23819518; PubMed Central PMCID: PMC3668206.
11. MOH. National Community-Based Health Planning and Service (CHPS) Policy: Accelerating Attainment of Universal Health Coverage and Bridging the Access Inequity Gap: MOH, Ghana; 2016.
12. Silverman D. *Interpreting qualitative data: Methods for analyzing talk, text and interaction*: Sage; 2006.
13. Patton M. *Qualitative research and evaluation methods* .(Rev. ed of: *Qualitative evaluation and research methods*. 2nd. Thousand Oaks, CA: Sage; 2002.
14. Takian A, Doshmangir L, Rashidian A. Implementing family physician programme in rural Iran: exploring the role of an existing primary health care network. *Family practice*. 2013:cmt025. doi: 10.1093/fampra/cmt025. PubMed PMID: 23788202.
15. Creswell JW. *Qualitative inquiry and research design: Choosing among five approaches*: Sage; 2013.
16. Gilson L, Raphaely N. The terrain of health policy analysis in low and middle income countries: a review of published literature 1994–2007. *Health policy and planning*. 2008;23(5):294-307. doi: 10.1093/heapol/czn019. PubMed PMID: 18650209. PubMed Central PMCID: PMC2515407.
17. Fereday J, Muir-Cochrane E. Demonstrating rigor using thematic analysis: A hybrid approach of inductive and deductive coding and theme development. *International journal of qualitative methods*. 2006;5(1):80-92.
18. Corbin JM, Strauss A. *Grounded theory research: Procedures, canons, and evaluative criteria*. *Qualitative sociology*. 1990;13(1):3-21.
19. Glenton C, Colvin CJ, Carlsen B, Swartz A, Lewin S, Noyes J, et al. Barriers and facilitators to the implementation of lay health worker programmes to improve access to maternal and child health: qualitative evidence synthesis. *Cochrane Database Syst Rev*. 2013;10(10). doi: 10.1002/14651858.CD010414.pub2. PMID: 24101553
20. Tulenko K, Mgedal S, Afzal MM, Frymus D, Oshin A, Pate M, et al. Community health workers for universal health-care coverage: from fragmentation to synergy. *Bulletin of the World Health Organization*. 2013;91:847-52. doi: 10.2471/BLT.13.118745. PMID: 24347709. PMCID: PMC3853952.

- 1
  - 2
  - 3
  - 4
  - 5
  - 6
  - 7
  - 8
  - 9
  - 10
  - 11
  - 12
  - 13
  - 14
  - 15
  - 16
  - 17
  - 18
  - 19
  - 20
  - 21
  - 22
  - 23
  - 24
  - 25
  - 26
  - 27
  - 28
  - 29
  - 30
  - 31
  - 32
  - 33
  - 34
  - 35
  - 36
  - 37
  - 38
  - 39
  - 40
  - 41
  - 42
  - 43
  - 44
  - 45
  - 46
  - 47
  - 48
  - 49
  - 50
  - 51
  - 52
  - 53
  - 54
  - 55
  - 56
  - 57
  - 58
  - 59
  - 60
21. Roberts M, Hsiao W, Berman P, Reich M. Getting health reform right: a guide to improving performance and equity: Oxford university press; 2003.
22. Wilsford D. States facing interests: struggles over health care policy in advanced, industrial democracies. *Journal of Health Politics, Policy and Law*. 1995;20(3):571-613. PubMed PMID: 8530769.
23. Buse K, Hawkes S. Health in the sustainable development goals: ready for a paradigm shift? *Globalization and health*. 2015;11(1):1. doi: 10.1186/s12992-015-0098-8. PubMed PMID: 25890267 PubMed Central PMCID: PMC4389312.
24. Martinez J, Ro M, William Villa N, Powell W, Knickman JR. Transforming the delivery of care in the post-health reform era: what role will community health workers play? *American Journal of Public Health*. 2011;101(12):e1-e5. doi: 10.2105/AJPH.2011.300335. PubMed PMID: 22021289 PubMed Central PMCID: PMC3222444.
25. Mate KS, Sifrim ZK, Chalkidou K, Cluzeau F, Cutler D, Kimball M, et al. Improving health system quality in low-and middle-income countries that are expanding health coverage: a framework for insurance. *International Journal for Quality in Health Care*. 2013;25(5):497-504. doi: 10.1093/intqhc/mzt053. PMID: 23959955.
26. Inglehart R, Welzel C. *Modernization, cultural change, and democracy: The human development sequence*: Cambridge University Press; 2005.
27. Harrison MI. *Implementing change in health systems: market reforms in the United Kingdom, Sweden and the Netherlands*: Sage; 2004.
28. Javanparast S, Baum F, Labonte R, Sanders D. Community health workers' perspectives on their contribution to rural health and well-being in Iran. *American journal of public health*. 2011;101(12):2287-92. doi: 10.2105/AJPH.2011.300355. PubMed PMID: 22021303 PubMed Central PMCID: PMC3222427.
29. Van Lerberghe W. *The world health report 2008: primary health care: now more than ever*: World Health Organization; 2008.
30. Organization WH. *The world health report 2000: health systems: improving performance*: World Health Organization; 2000.
31. Organization WH. *The world health report 2006: working together for health*: World Health Organization; 2006.
32. Tangcharoensathien V, Mills A, Palu T. Accelerating health equity: the key role of universal health coverage in the Sustainable Development Goals. *BMC medicine*. 2015;13(1):1. doi: 10.1186/s12916-015-0342-3. PubMed PMID: 25925656; PubMed Central PMCID: PMC4415234
33. Kenny C, Sumner A. More money or more development: what have the MDGs achieved? Center for Global Development working paper. 2011(278).

Table 1: List of interviewees and their characteristics &amp; Study settings

| Region                            | Central Region                                                                                                                                                                                                                                                   | Greater Accra Region                                                                                                                                   | Upper East Region                                                                                                                                        | Volta Region                                                                          | Total     |
|-----------------------------------|------------------------------------------------------------------------------------------------------------------------------------------------------------------------------------------------------------------------------------------------------------------|--------------------------------------------------------------------------------------------------------------------------------------------------------|----------------------------------------------------------------------------------------------------------------------------------------------------------|---------------------------------------------------------------------------------------|-----------|
| <b>Levels</b>                     |                                                                                                                                                                                                                                                                  |                                                                                                                                                        |                                                                                                                                                          |                                                                                       |           |
| <b>National Level</b>             | Head of CHPS (1), Head of monitoring and evaluation (1), other senior officials (2) at Policy, Planning, Monitoring and Evaluation unit at the Ministry of Health, and Renowned researcher on CHPS (1).                                                          |                                                                                                                                                        |                                                                                                                                                          |                                                                                       | 5         |
| <b>Region Levels</b>              | <i>Cape Coast</i>                                                                                                                                                                                                                                                | <i>Accra</i>                                                                                                                                           | <i>Bolgatanga</i>                                                                                                                                        | <i>Ho</i>                                                                             | 11        |
|                                   | Deputy regional director for health administration and support services (1); Regional director for public health (1); Senior public health nurse (1); Head of service training (1); Regional health information officer (1); Regional human resource manager (1) | Regional CHPS coordinator & deputy director of nursing services (1)                                                                                    | Regional CHPS coordinator (1); Senior reproductive and Child Health (RCH) (1); Information officer (1)                                                   | Regional CHPS coordinator (1)                                                         |           |
| <b>District /Municipal Levels</b> | <i>Assin North District</i>                                                                                                                                                                                                                                      | <i>Kpone Katamanso District</i>                                                                                                                        | <i>Bolgatanga Municipal &amp; Kassena Nankana West District</i>                                                                                          | <i>Ho municipal</i>                                                                   | 9         |
|                                   | Municipal health director (1)<br>Municipal CHPS coordinator (1)<br>Municipal nutrition technical officer (1);<br>Community mental health officer (1)                                                                                                             | District health director (1)                                                                                                                           | Municipal CHPS coordinator (1); District CHPS coordinator (1); Nursing officer (1)                                                                       | Municipal CHPS coordinator (1)                                                        |           |
| <b>Sub-district/ Local levels</b> | <i>Assin Endwa CHPS compound</i>                                                                                                                                                                                                                                 | <i>Appolonia CHPS compound</i>                                                                                                                         | <i>Yikene &amp; Nania CHPS compound</i>                                                                                                                  | <i>Loboli &amp; Atikpui CHPS compound</i>                                             | 42        |
|                                   | Community health nurse (CHN) (1); Head of facility (1); Enrolled nurses(EN) (1); Community health management committee (CHMC) – Traditional leader (chief) (1), Assembly member (1); Other opinion leaders (2)                                                   | General nurse (1); CHN (1); Midwife (1); EN (1); Nursing officer (1); CHMC – Traditional committee (2), Assembly member (1); Other opinion leaders (3) | CHN (1); EN (2); CHO (2); CHW (3); Midwife (1); CHMC – (Traditional leader (1), Religious leader (1), Assembly member (1), Community youth volunteer (2) | EN (3); Head of facility (2); CHOs (2); CHW (2); CHMC - Community youth volunteer (1) |           |
| <b>Total</b>                      | 17                                                                                                                                                                                                                                                               | 13                                                                                                                                                     | 20                                                                                                                                                       | 12                                                                                    | <b>67</b> |

## Challenges to achieving universal health coverage through community-based health planning and services delivery approach: a qualitative study in Ghana

### Standards for Reporting Qualitative Research (SRQR)

| No. | Topic                                                                                        | Item (Refer Page No.) |
|-----|----------------------------------------------------------------------------------------------|-----------------------|
| S1  | Title                                                                                        | Page: 1               |
| S2  | Abstract                                                                                     | Page: 2,3             |
|     | <b>Introduction</b>                                                                          |                       |
| S3  | Problem formulation                                                                          | Page: 3,4             |
| S4  | Purpose or research question                                                                 | Page: 4               |
|     | <b>Methods</b>                                                                               |                       |
| S5  | Qualitative approach and research paradigm                                                   | Page: 4,5             |
| S6  | Researcher characteristics and reflexivity                                                   | Page: 4,5             |
| S7  | Context                                                                                      | Page: 4,18            |
| S8  | Sampling strategy                                                                            | Page: 4,5             |
| S9  | Ethical issues pertaining to human subjects                                                  | Page: 6               |
| S10 | Data collection methods                                                                      | Page: 4,5             |
| S11 | Data collection instruments and technologies                                                 | Page: 4,5             |
| S12 | Units of study                                                                               | Page: 4,5             |
| S13 | Data processing                                                                              | Page: 5,6             |
| S14 | Data analysis                                                                                | Page: 5               |
| S15 | Techniques to enhance trustworthiness                                                        | Page: 3, 4, 5,6       |
|     | <b>Results/findings</b>                                                                      |                       |
| S16 | Synthesis and interpretation                                                                 | Page: 6,7,8,9,10,11   |
| S17 | Links to empirical data                                                                      | Page: 6,7,8,9,10,11   |
|     | <b>Discussion</b>                                                                            |                       |
| S18 | Integration with prior work, implications, transferability, and contribution(s) to the field | Page: 11,12,13,14     |
| S19 | Limitations                                                                                  | Page: 3               |
|     | <b>Others</b>                                                                                |                       |

1  
2  
3  
4  
5  
6  
7  
8  
9  
10  
11  
12  
13  
14  
15  
16  
17  
18  
19  
20  
21  
22  
23  
24  
25  
26  
27  
28  
29  
30  
31  
32  
33  
34  
35  
36  
37  
38  
39  
40  
41  
42  
43  
44  
45  
46  
47

|     |                       |         |
|-----|-----------------------|---------|
| S20 | Conflicts of interest | Page: 2 |
| S21 | Funding               | Page: 1 |

For peer review only
